# Supplementary material
Source: PubMed Central journal article supplement (PMC2862459)
Supplement: NIHMS195150-supplement-SI.pdf [file NIHMS195150-supplement-SI.pdf]

**Functional analysis of members of the isoflavone and isoflavanone *O*-methyltransferase enzyme families from the model legume *Medicago truncatula***

**Bettina E. Deavours, Chang-Jun Liu, Marina Naoumkina, Yuhong Tang, Mohamed A. Farag, Lloyd W. Sumner, Joseph P. Noel and Richard A. Dixon**

**Supplementary Material**

**Figure S1a-n.** HPLC chromatograms of MtIOMT reaction products

**Figure S2.** Positive ion LC/ESI/MSMS spectra of reaction products from liquiritigenin

**Figure S3.** Positive ion LC/ESI/MSMS spectra of reaction products from naringenin

**Figure S4.** Positive ion LC/ESI/MSMS spectra of reaction products from dihydrodaidzein

**Table S1.** Primers used for RT-PCR

**Table S2.** Quantification of methylated products in reactions with dihydrodaidzein

# 6,7,4'-trihydroxyisoflavone

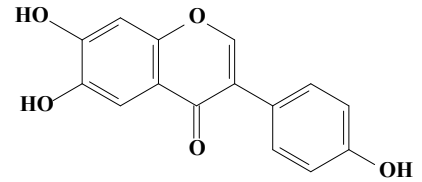

Control

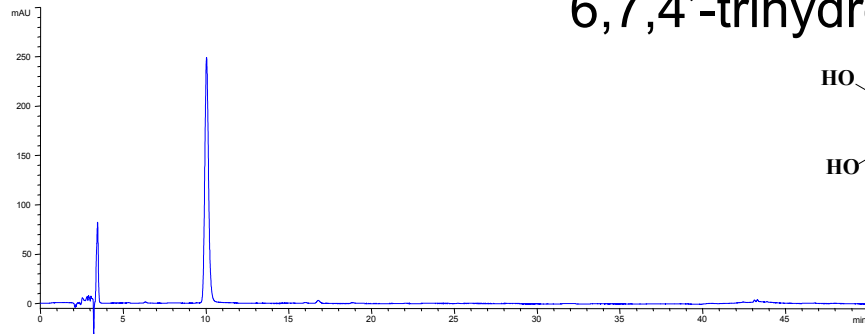

MtIOMT1

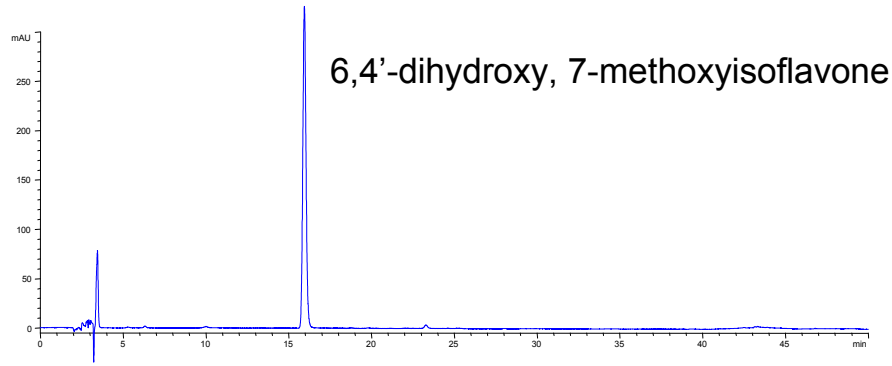

MtIOMT2

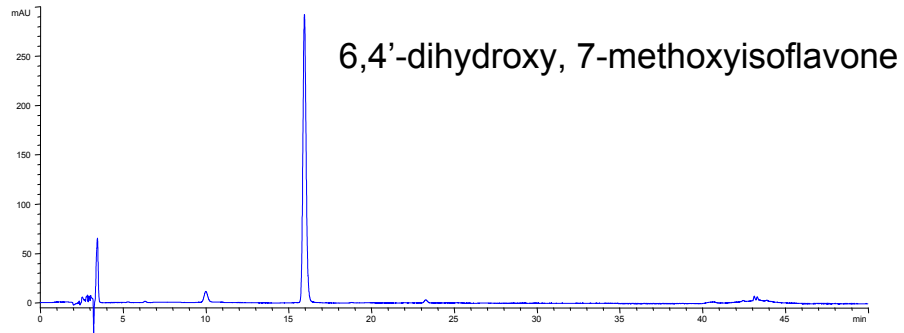

MtIOMT3

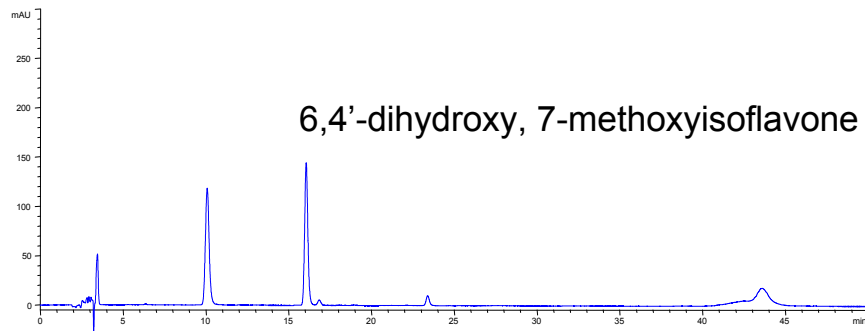

MtIOMT4

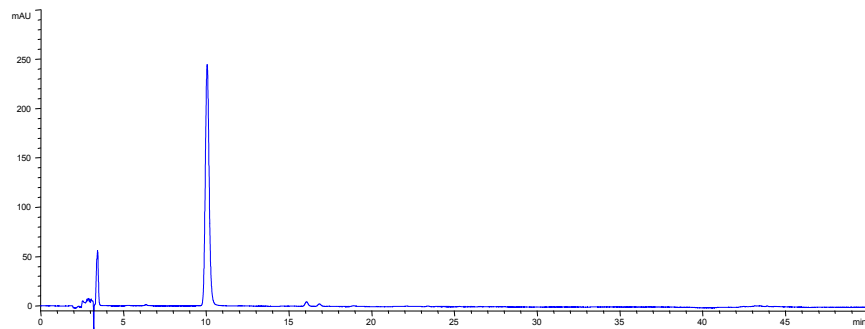

Figure S1(a). HPLC traces of reaction products with 6,7,4'-trihydroxyisoflavone

# 6,7,4'-trihydroxyisoflavone



MtIOMT5

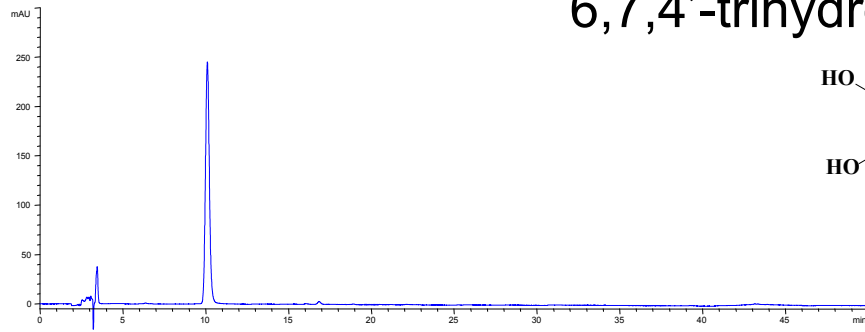

MtIOMT6

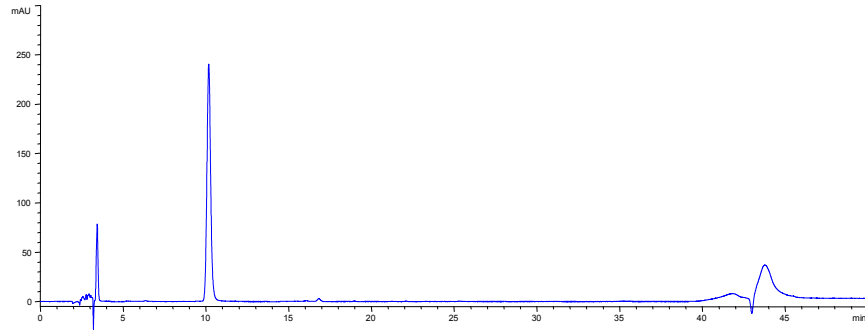

MtIOMT7

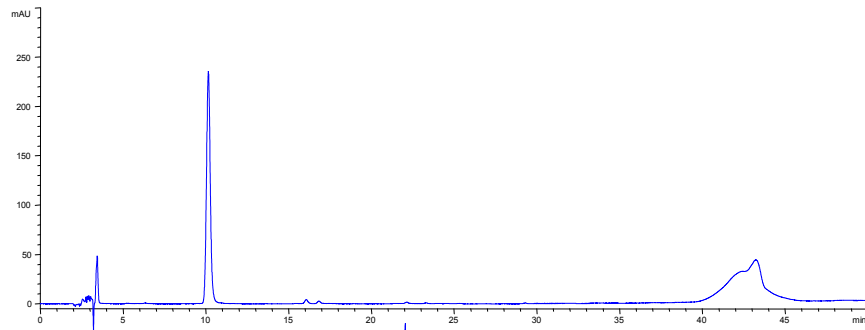

Standard

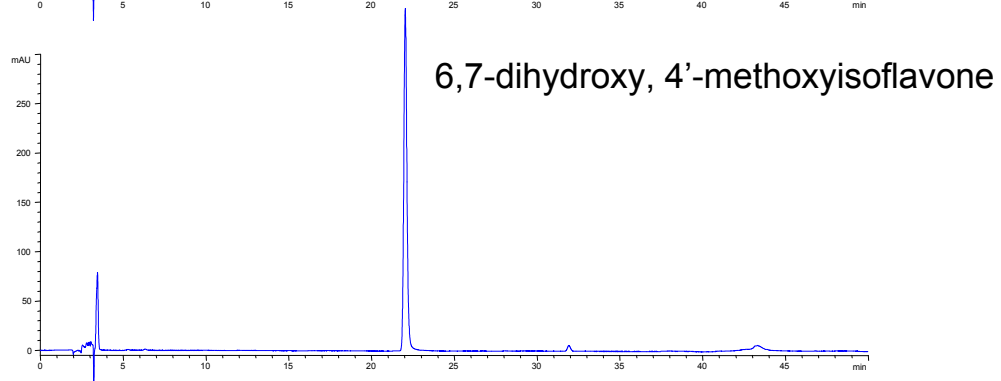

Standard

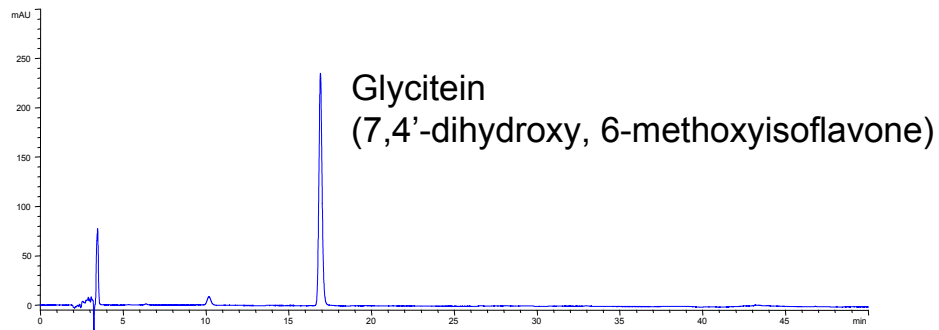

Figure S1(a), cont. HPLC traces of reaction products with 6,7,4'-trihydroxyisoflavone

# 6,7-dihydroxy, 4'-methoxyisoflavone

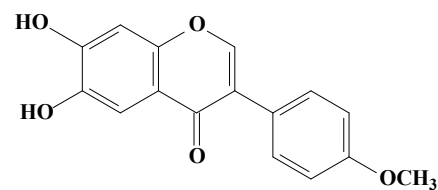

Control

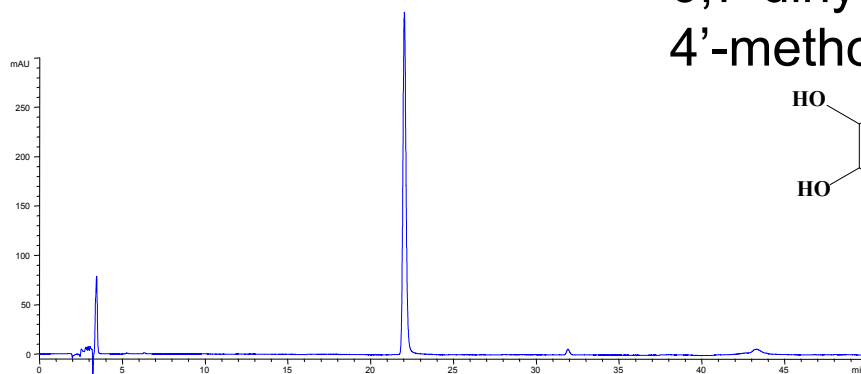

MtIOMT1

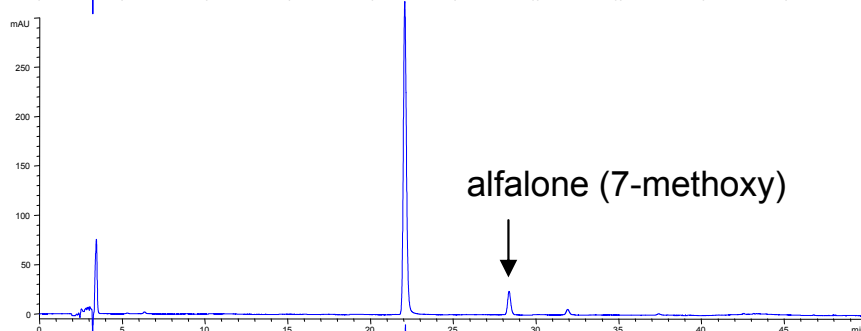

MtIOMT2

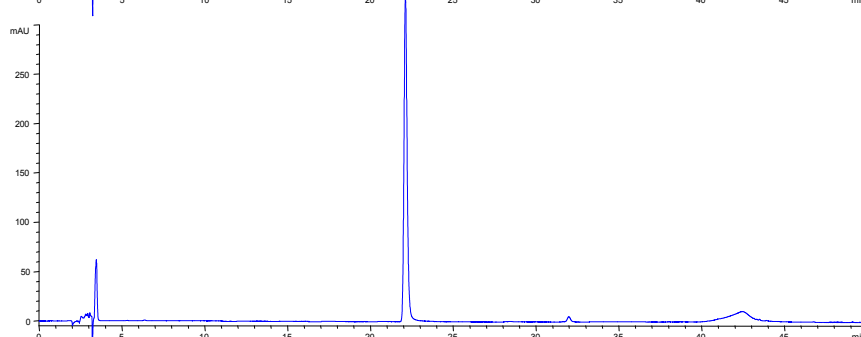

MtIOMT3

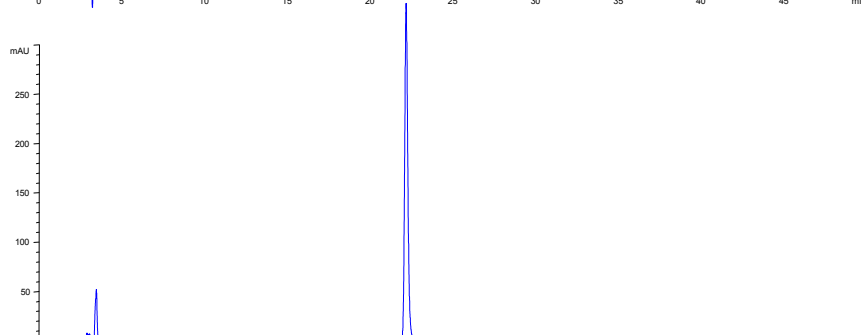

MtIOMT4

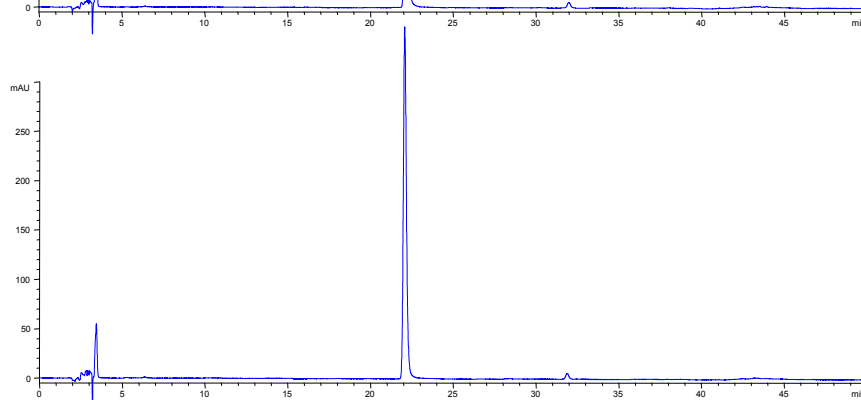

Figure S1(b). HPLC traces of reaction products with 6,7-dihydroxy, 4'-methoxyisoflavone

6,7-dihydroxy,  
4'-methoxyisoflavone

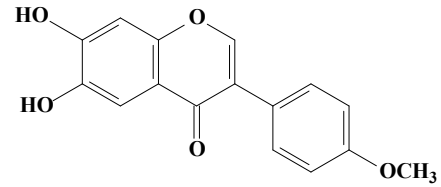

MtIOMT5

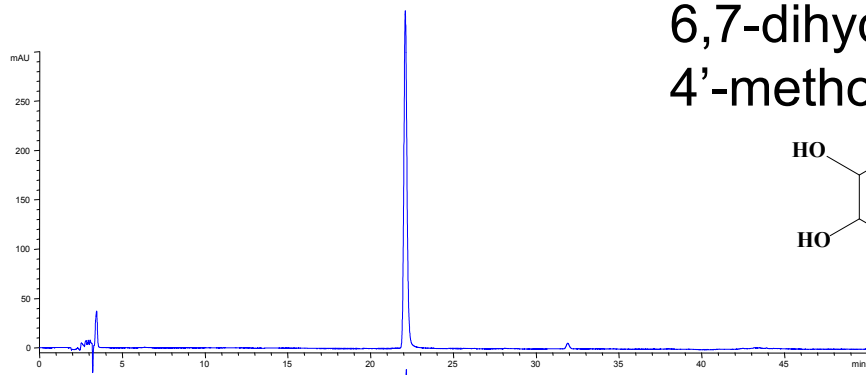

MtIOMT6

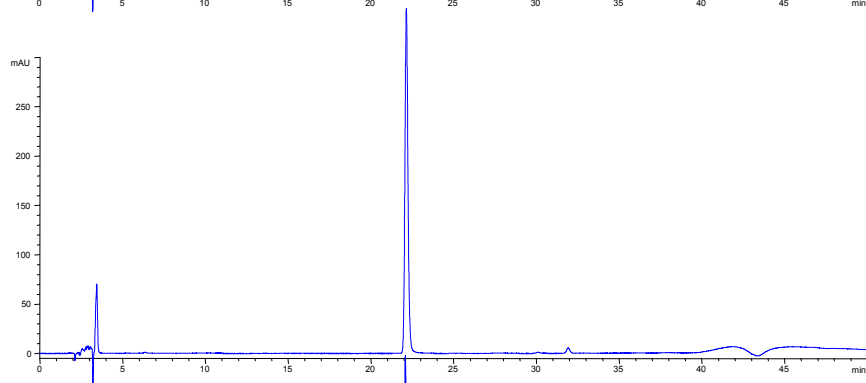

MtIOMT7

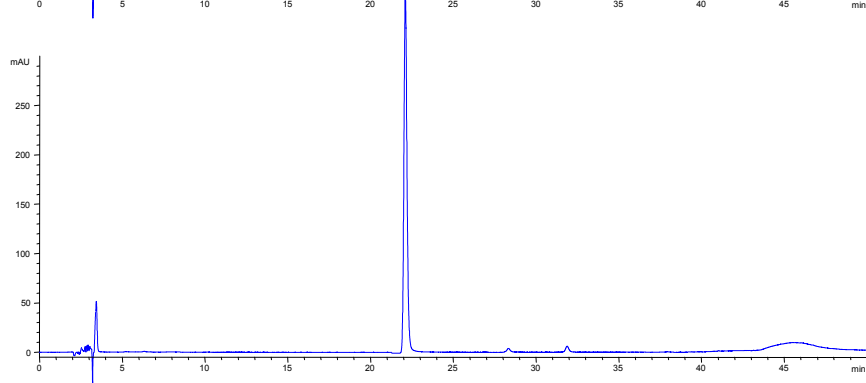

Standard

Alfalone (7,4'-dimethoxy, 6-hydroxyisoflavone)

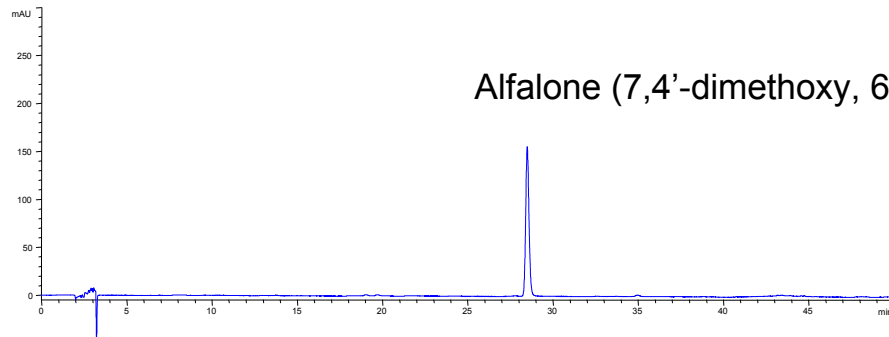

Standard

Afromosin (6,4'-dimethoxy, 7-hydroxyisoflavone)

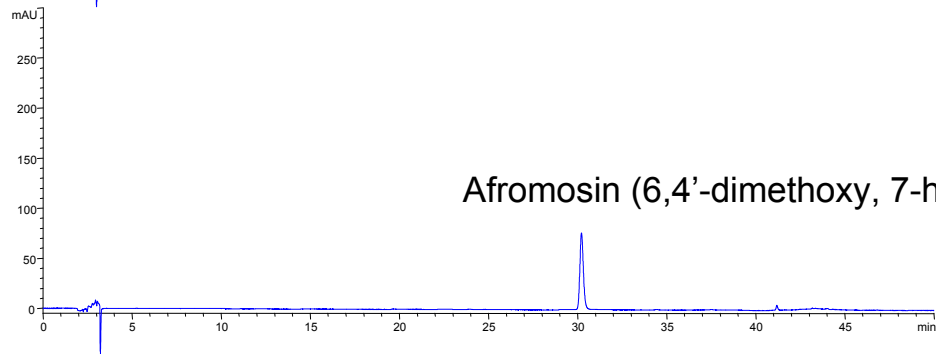

Figure S1(b), cont. HPLC traces of reaction products with 6,7-dihydroxy, 4'-methoxyisoflavone

# 7,3',4'-trihydroxyisoflavone

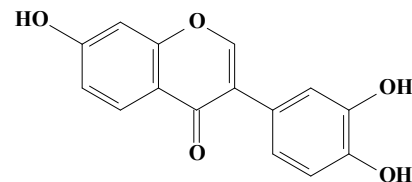

Control

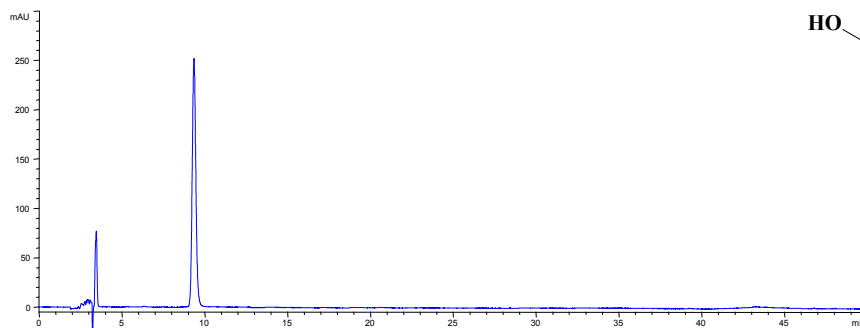

MtIOMT1

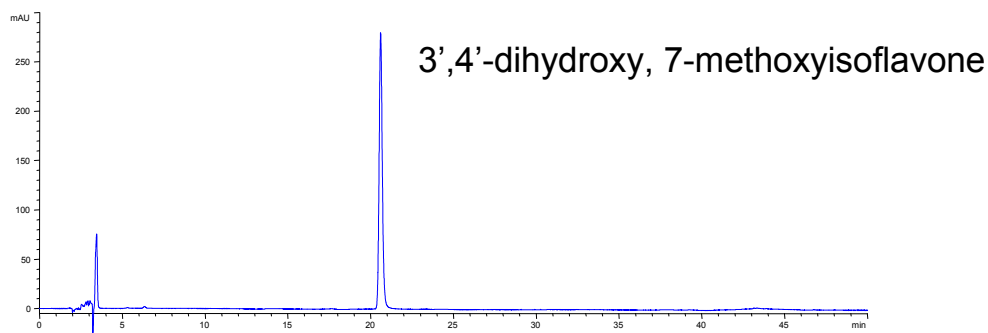

MtIOMT2

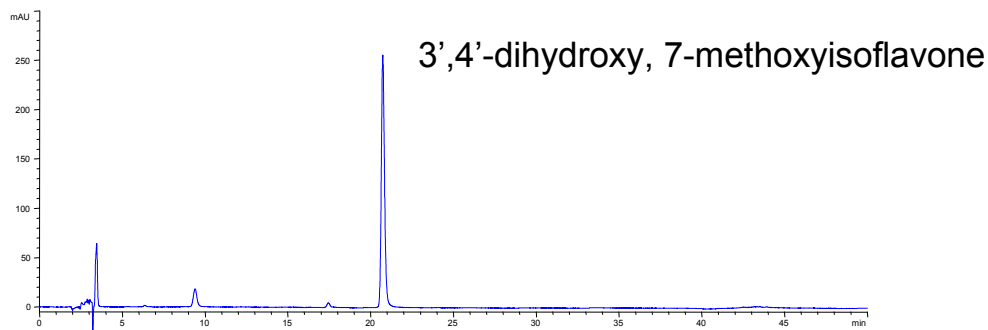

MtIOMT3

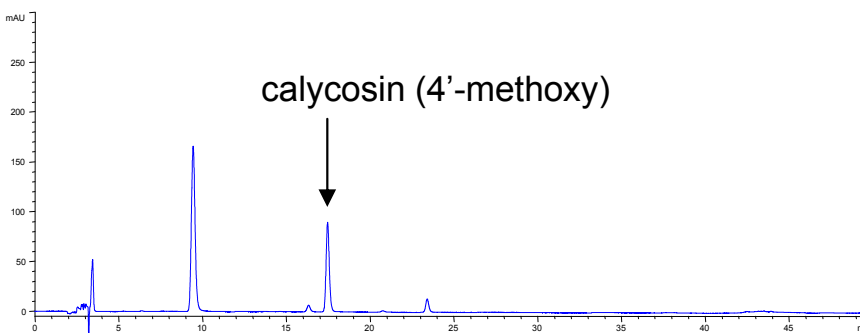

MtIOMT4

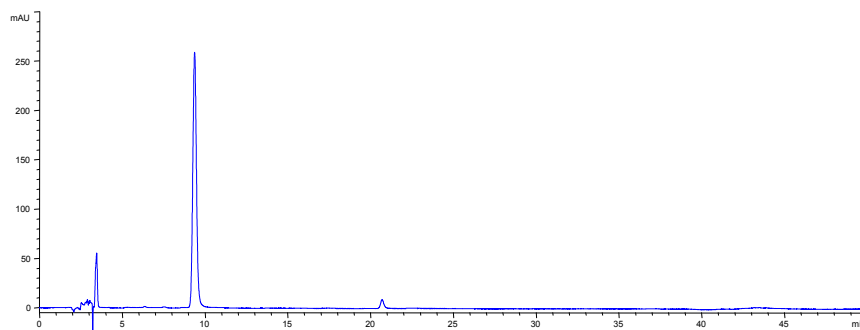

Figure S1(c). HPLC traces of reaction products with 7,3',4'-trihydroxyisoflavone

# 7,3',4'-trihydroxyisoflavone



MtIOMT5

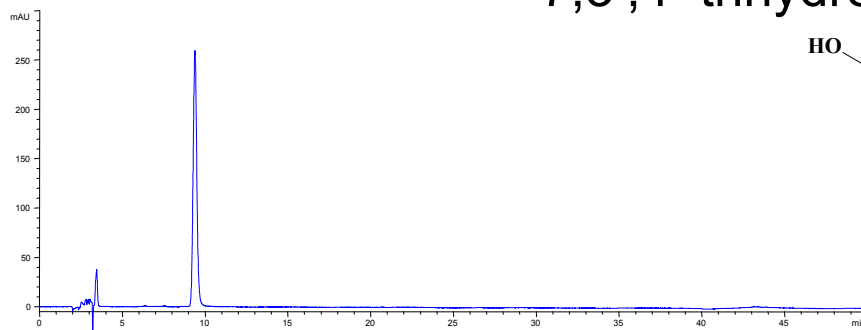

MtIOMT6

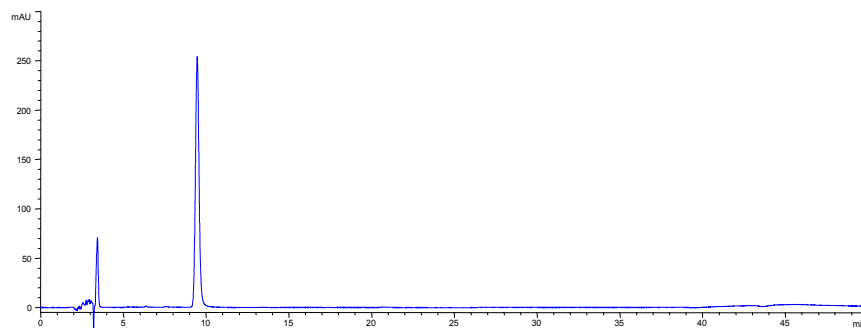

MtIOMT7

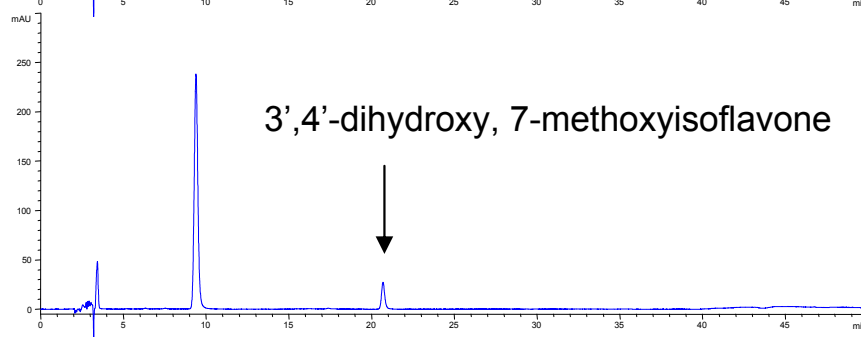

Standard

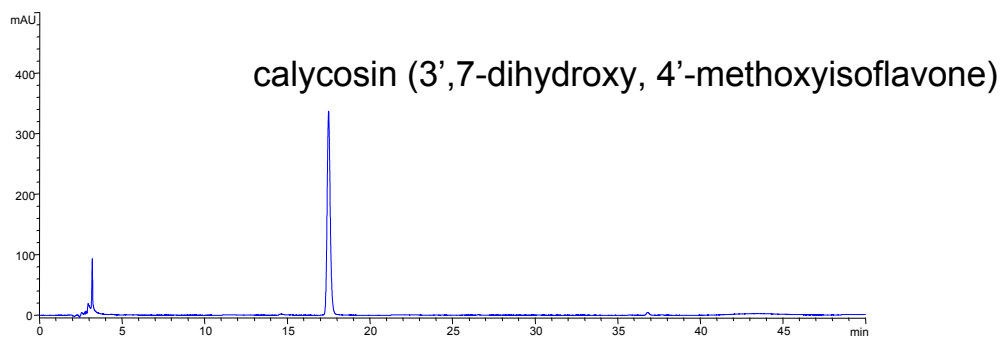

Standard

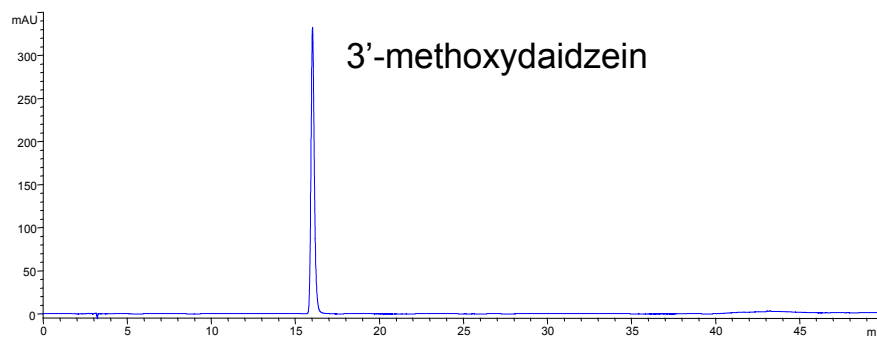

Figure S1(c), cont. HPLC traces of reaction products with 7,3',4'-trihydroxyisoflavone

# daidzein

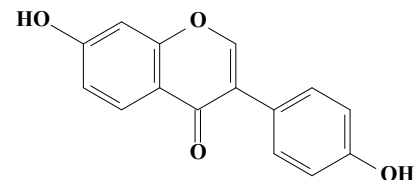

Control

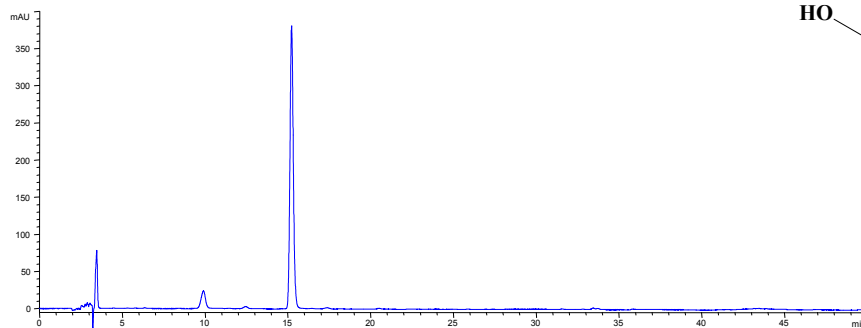

MtIOMT1

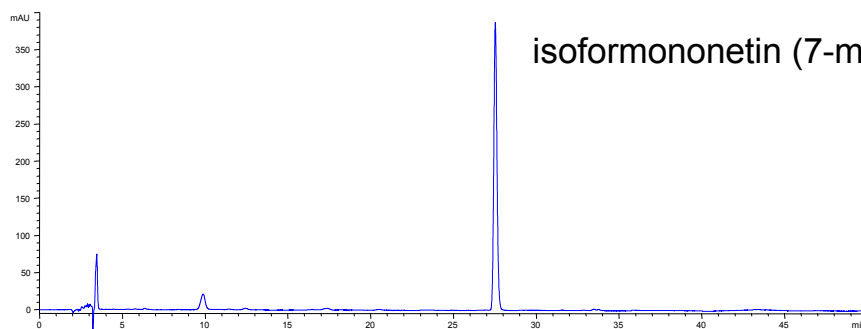

MtIOMT2

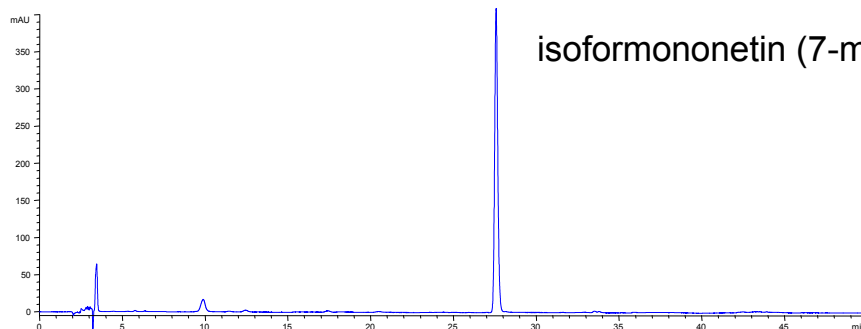

MtIOMT3

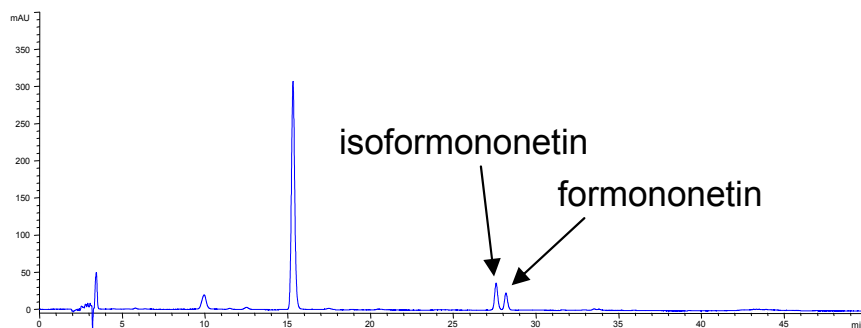

MtIOMT4

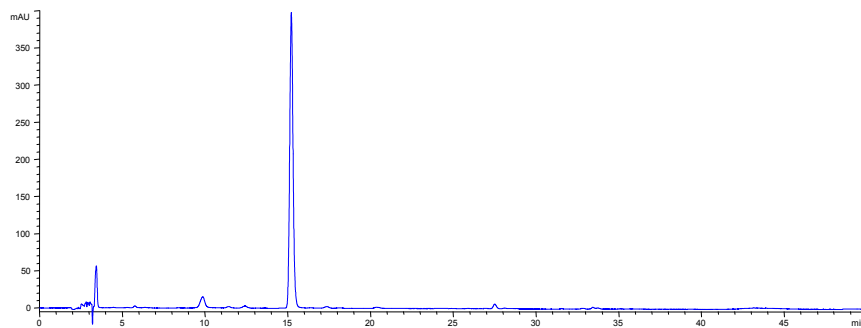

Figure S1(d). HPLC traces of reaction products with daidzein



# daidzein



MtIOMT5

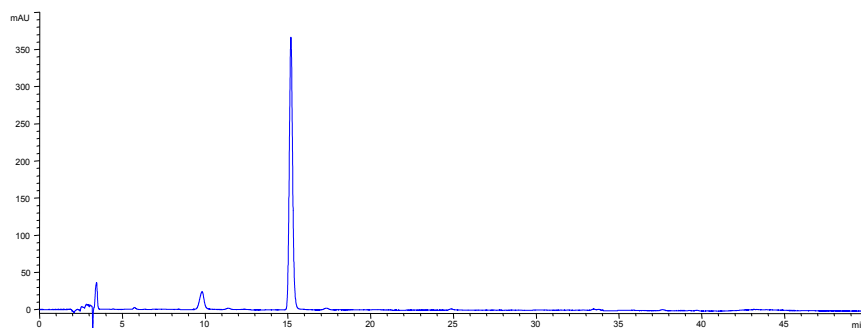

MtIOMT6

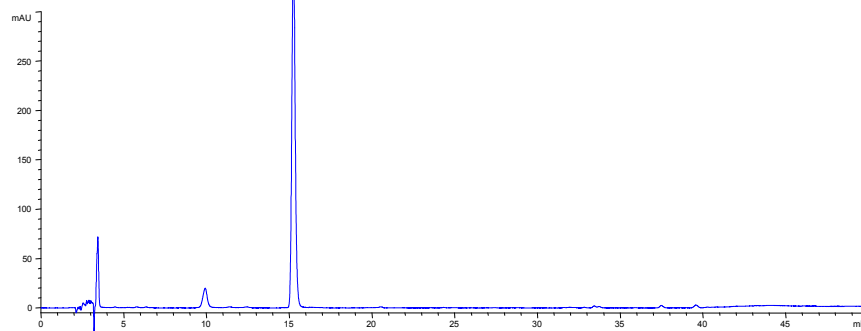

MtIOMT7

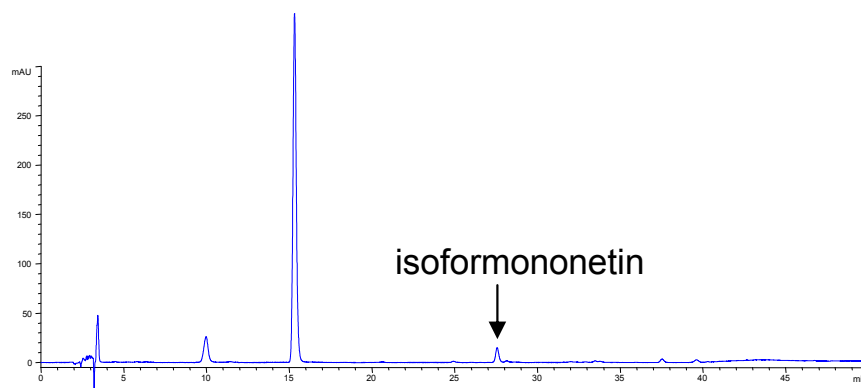

Standards

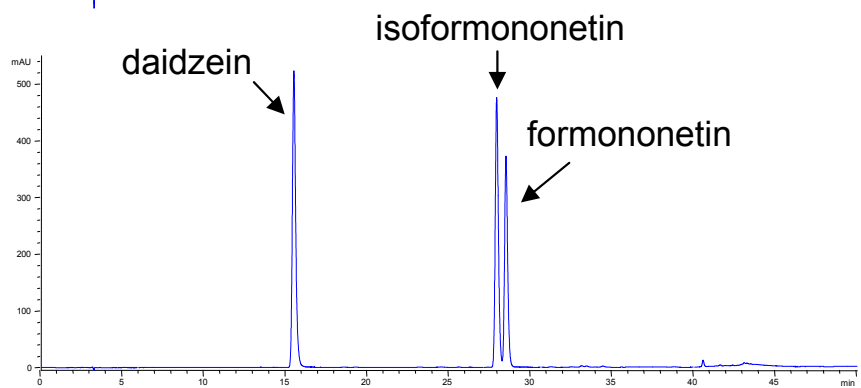

Figure S1(d), cont. HPLC traces of reaction products with daidzein

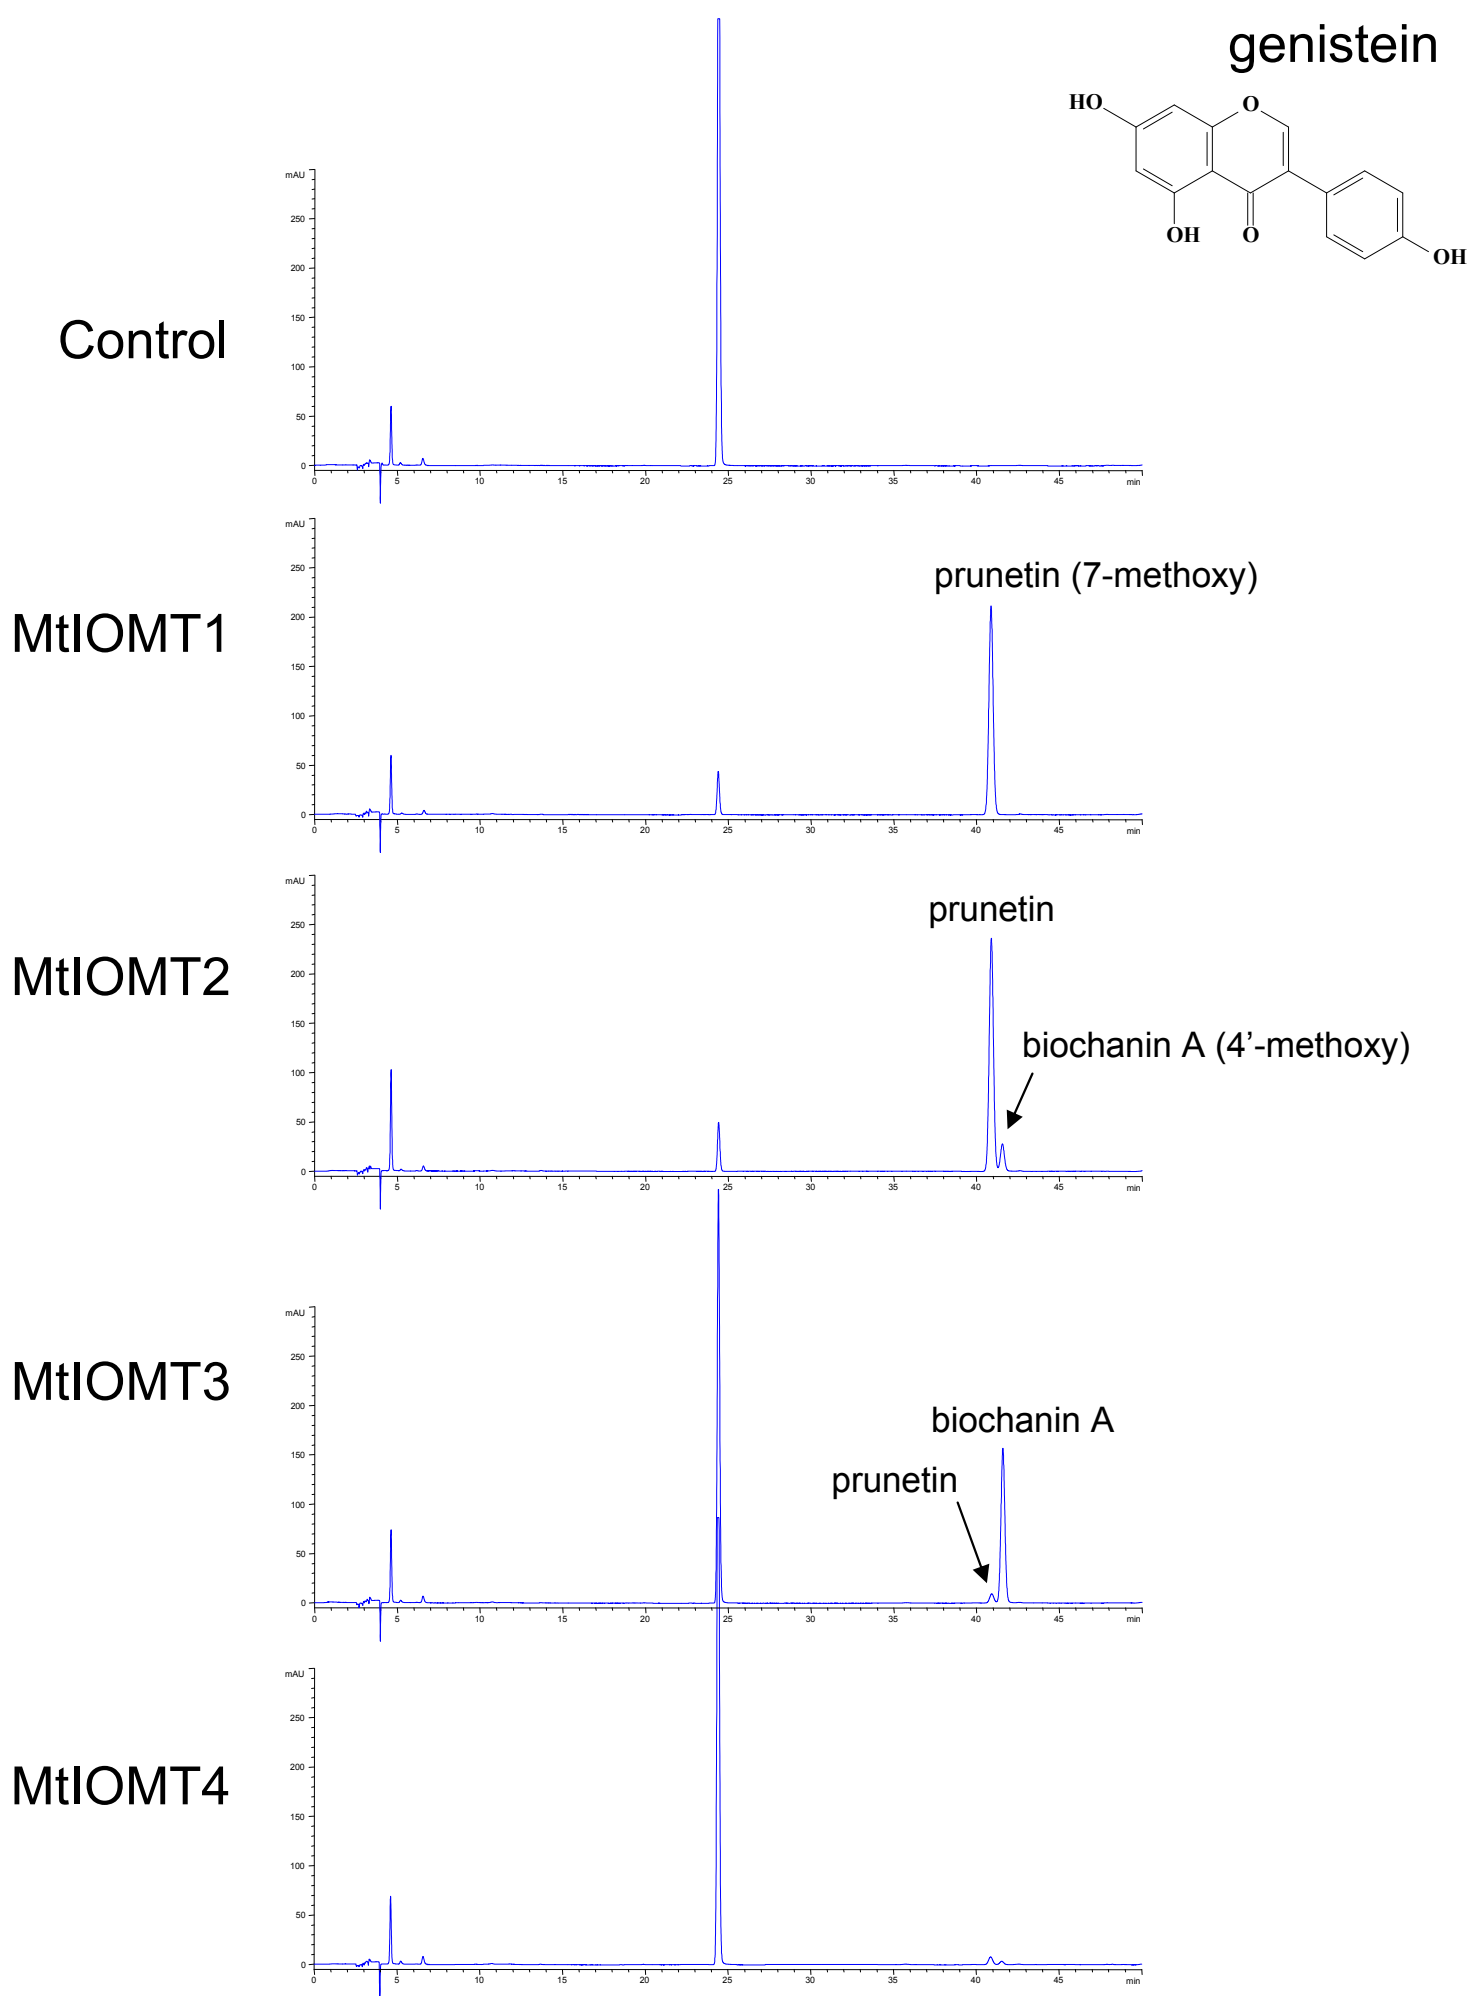

Figure S1(e). HPLC traces of reaction products with genistein

# genistein

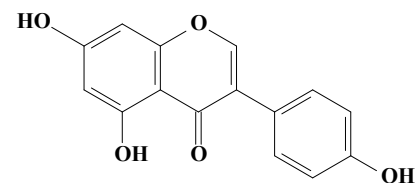

MtIOMT5

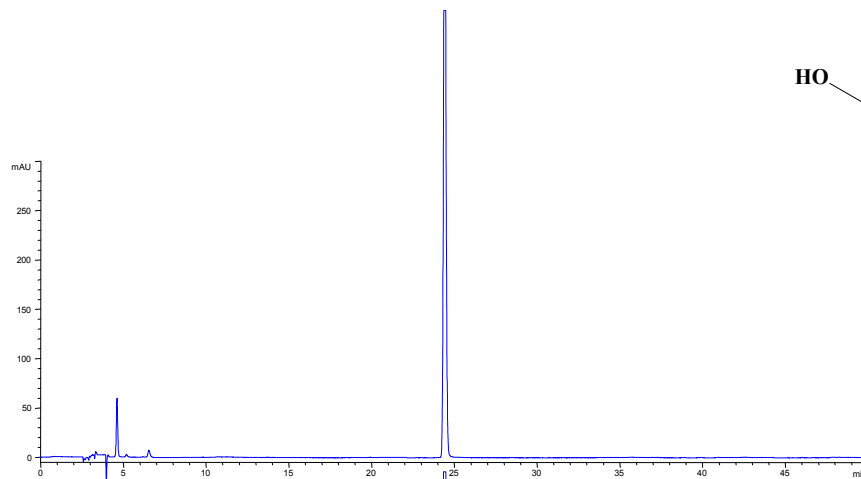

MtIOMT6

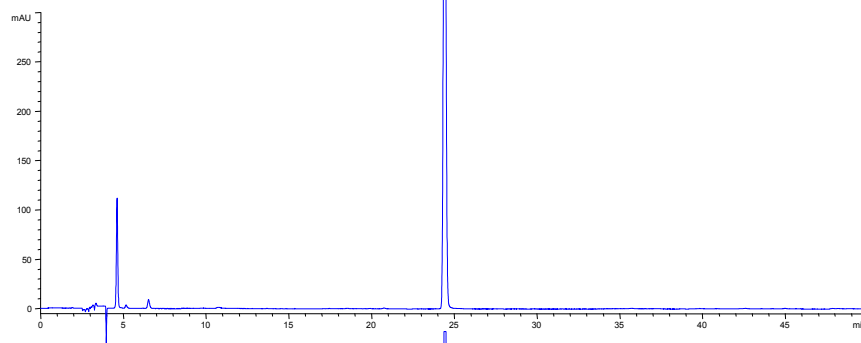

MtIOMT7

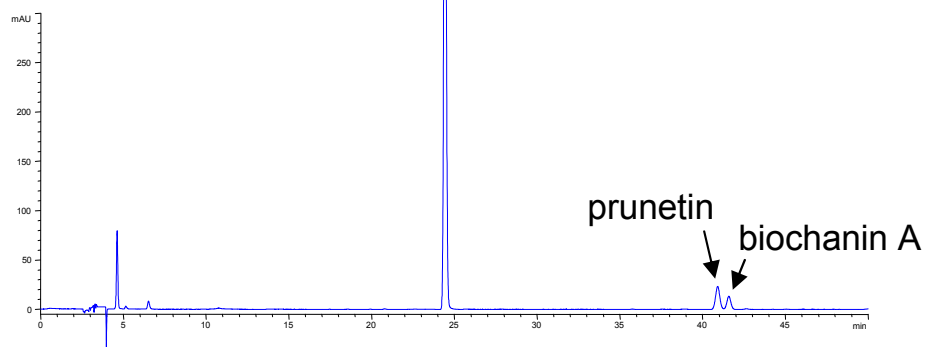

Standards

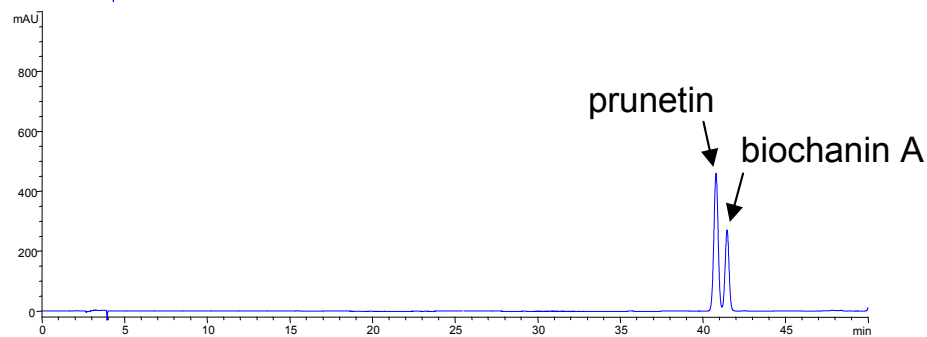

Figure S1(e), cont. HPLC traces of reaction products with genistein

glycitein

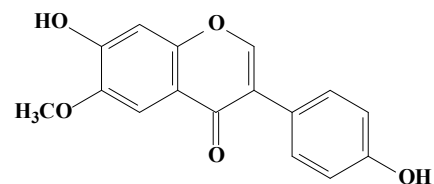

Control

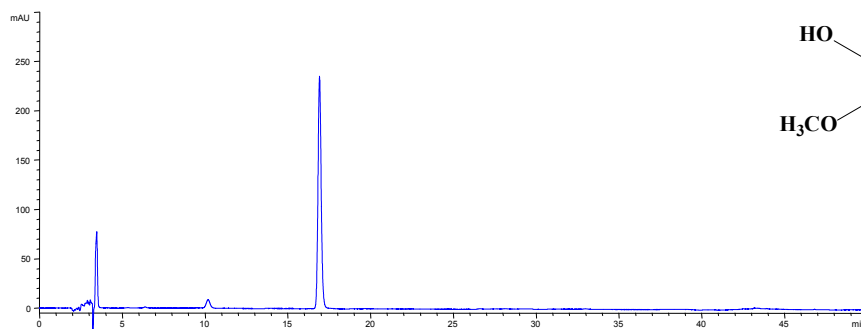

MtIOMT1

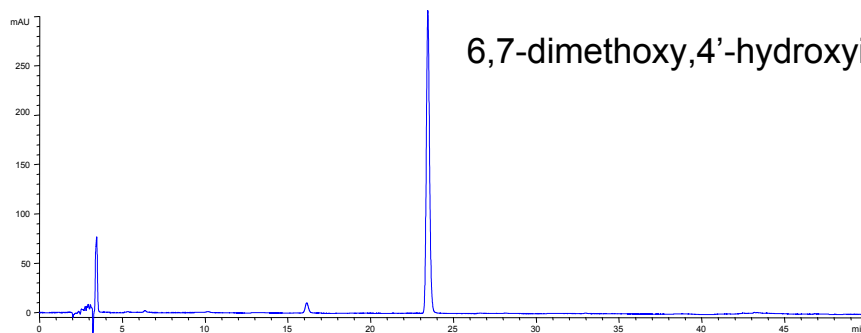

MtIOMT2

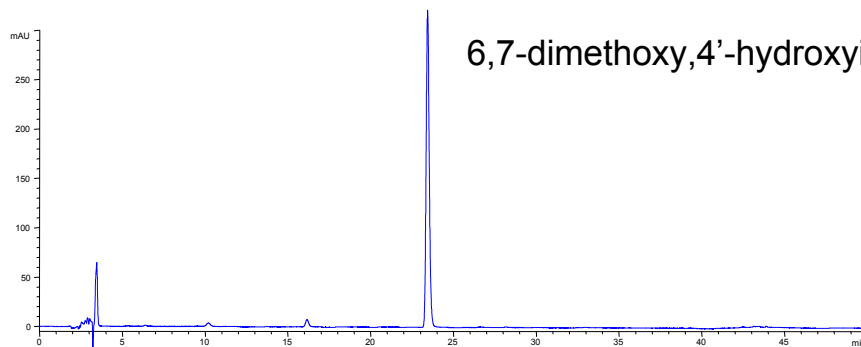

MtIOMT3

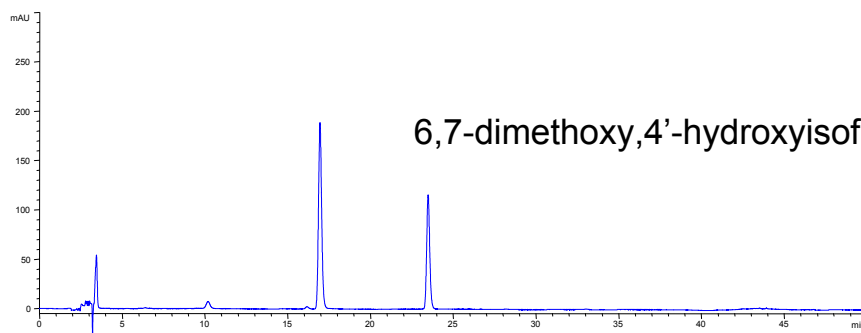

MtIOMT4

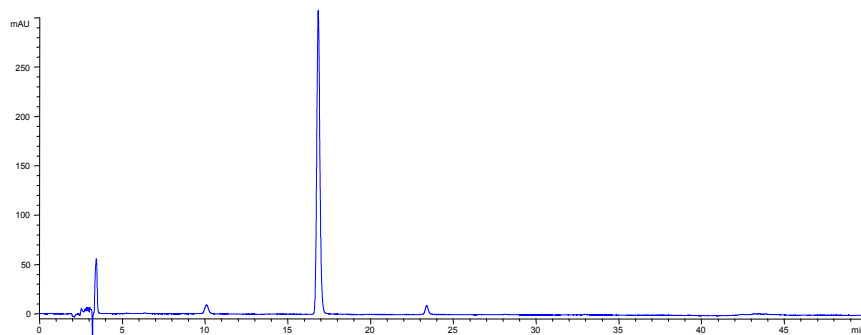

Figure S1(f). HPLC traces of reaction products with glycitein

# glycitein



MtIOMT5

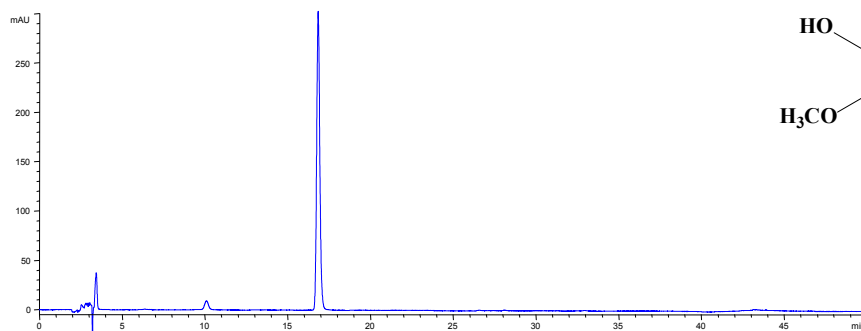

MtIOMT6

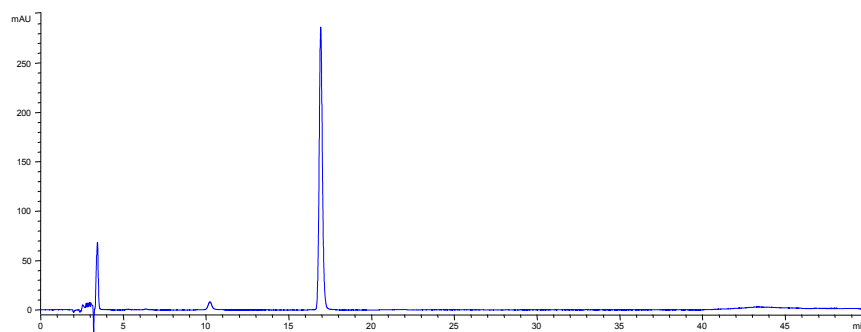

MtIOMT7

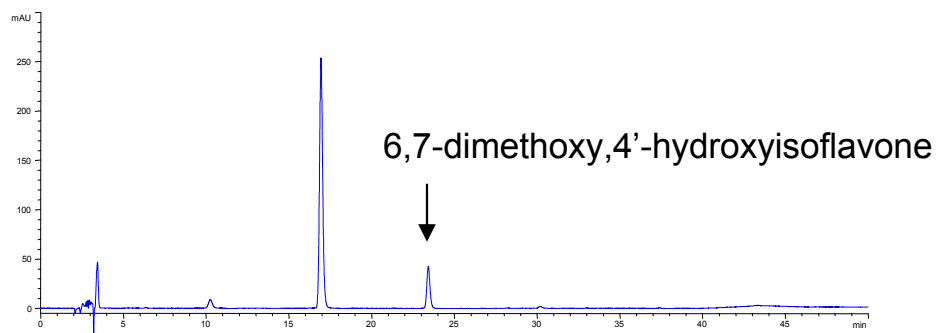

Standard

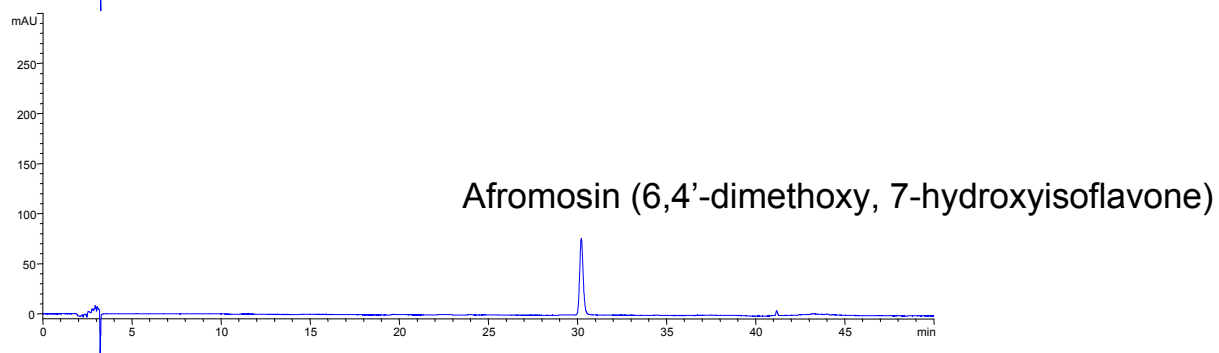

Figure S1(f), cont. HPLC traces of reaction products with glycitein

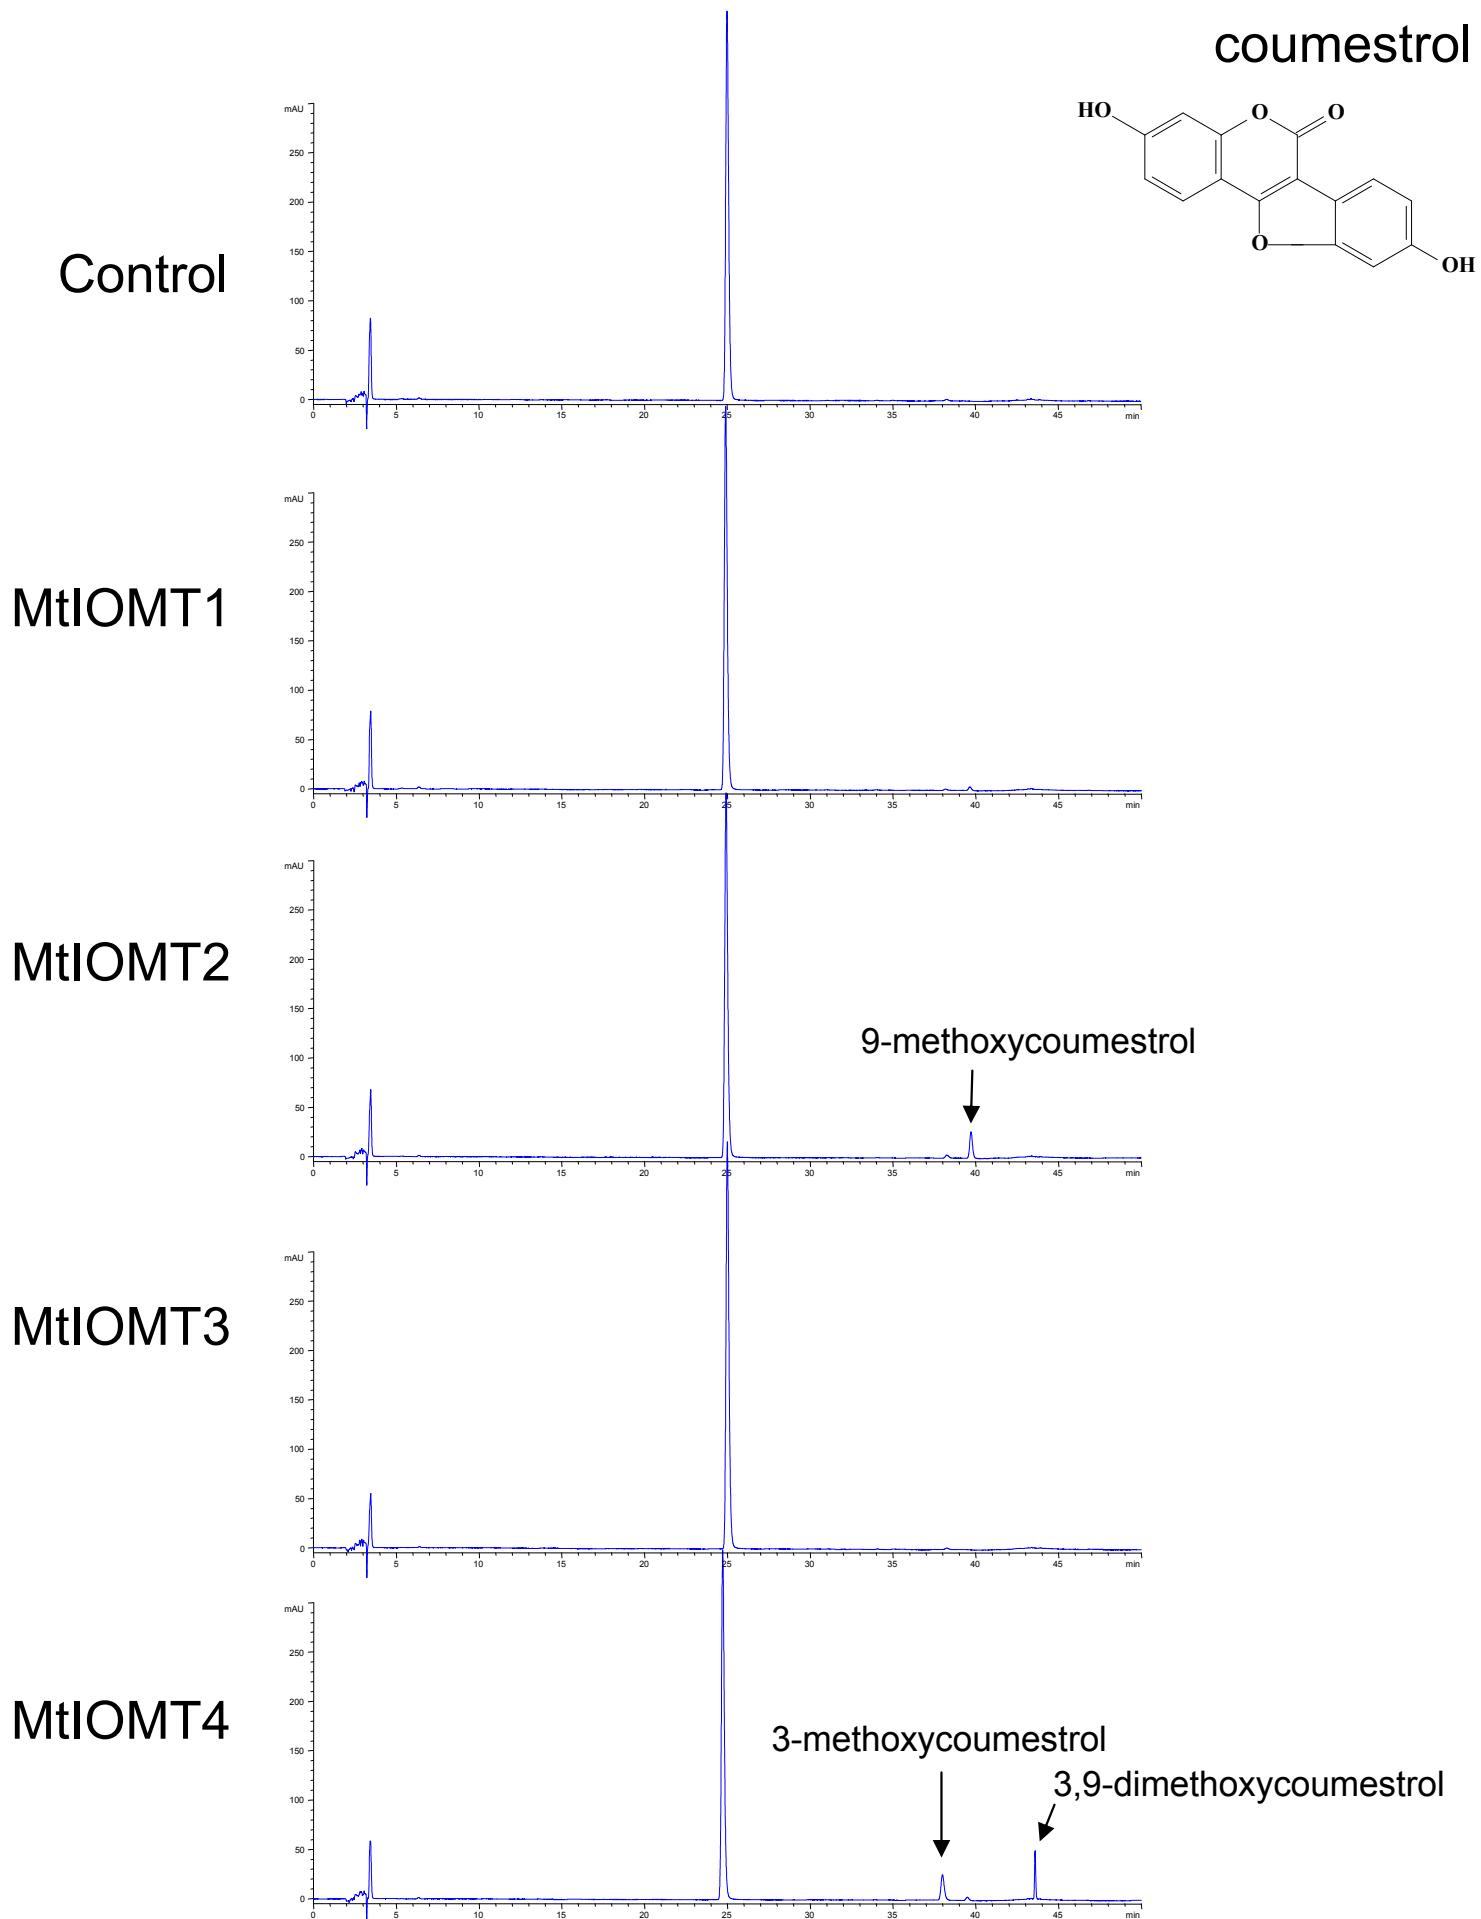

Figure S1(g). HPLC traces of reaction products with coumestrol

# coumestrol

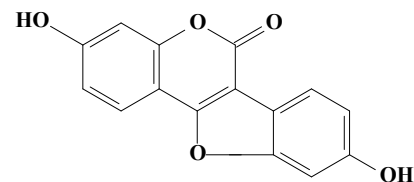

MtIOMT5

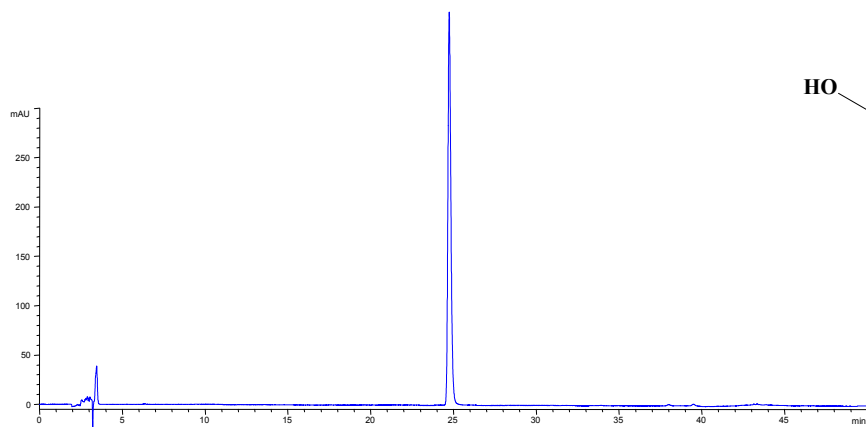

MtIOMT6

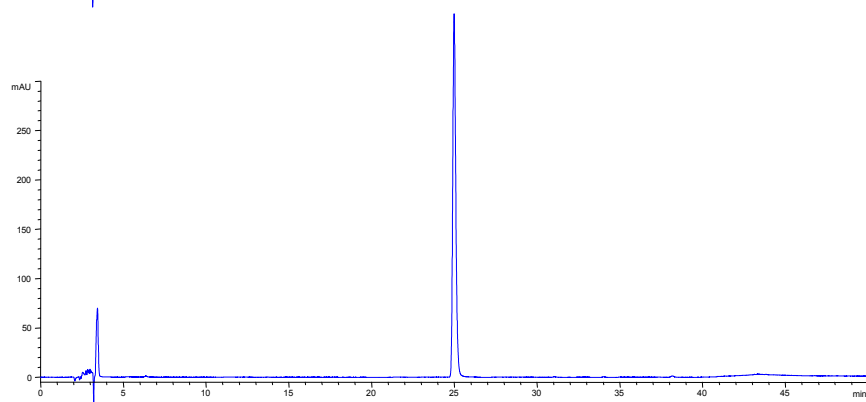

MtIOMT7

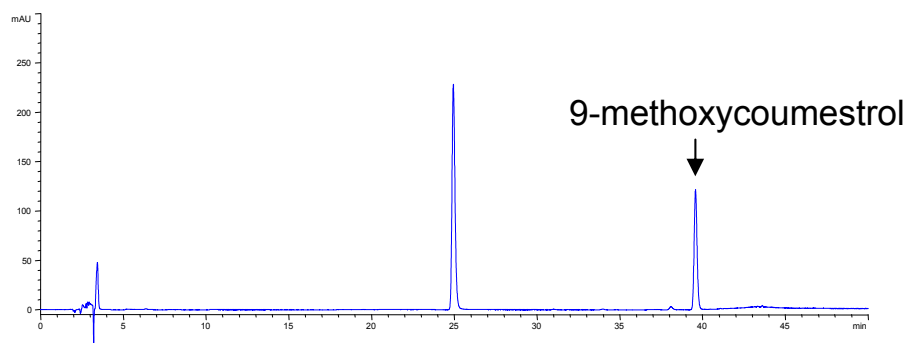

Standard

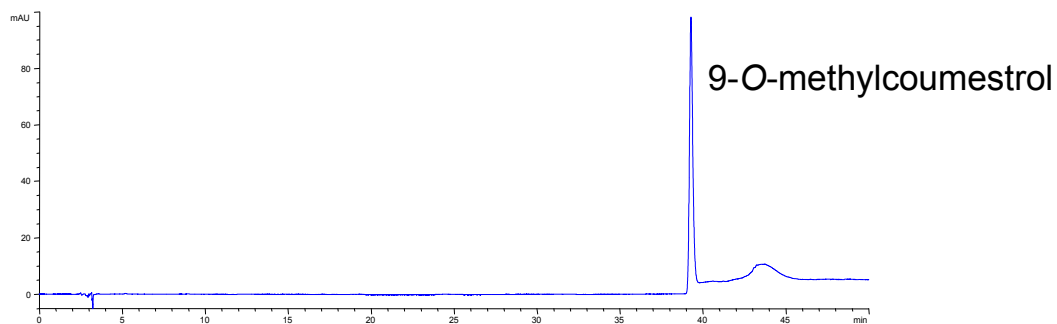

Figure S1(g), cont. HPLC traces of reaction products with coumestrol

vestitol

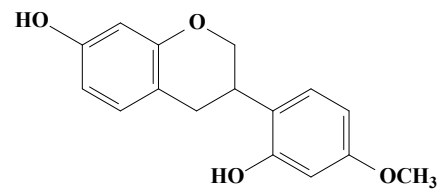

Control

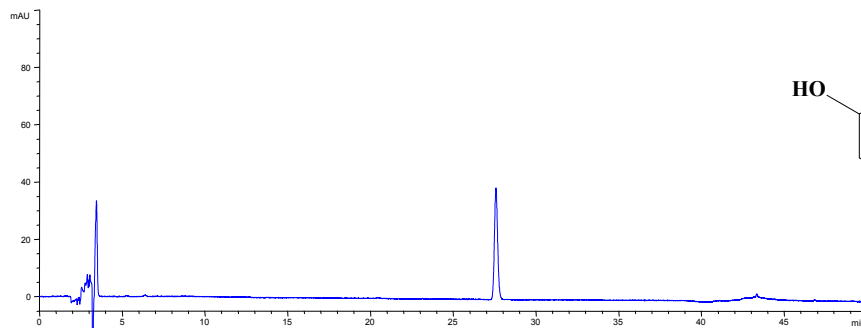

MtIOMT1

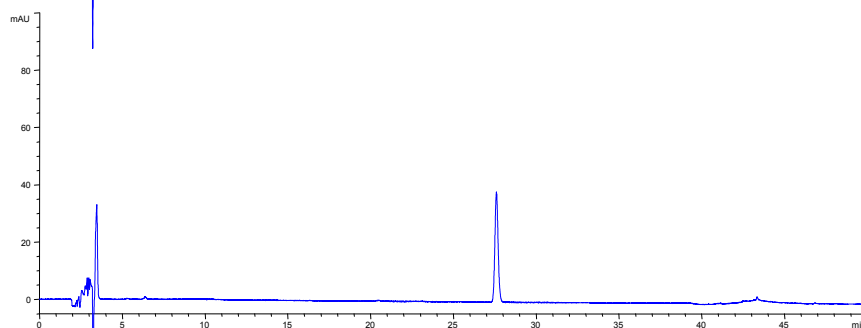

MtIOMT2

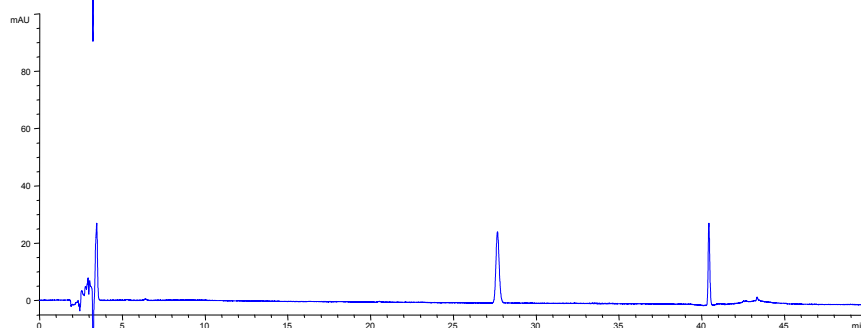

MtIOMT3

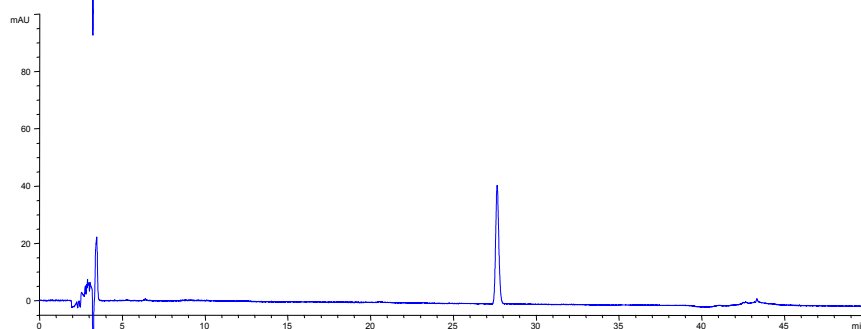

MtIOMT4

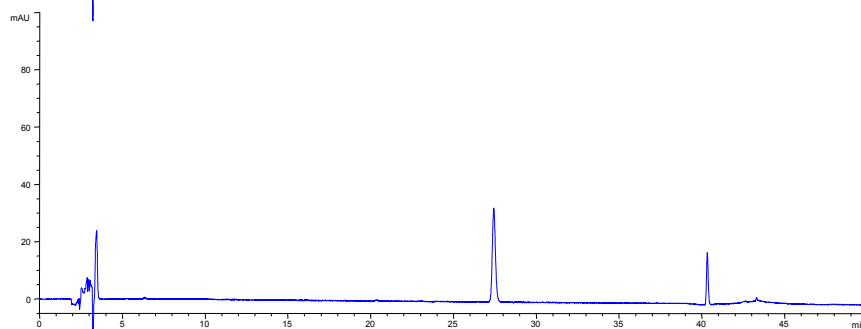

Figure S1(h). HPLC traces of reaction products with vestitol



MtlIOMT5

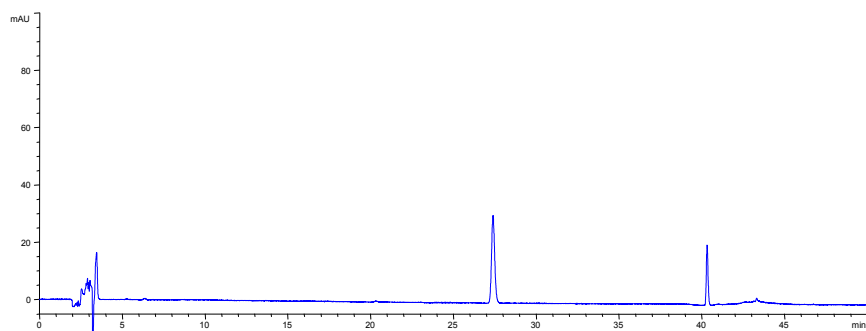

MtlIOMT6

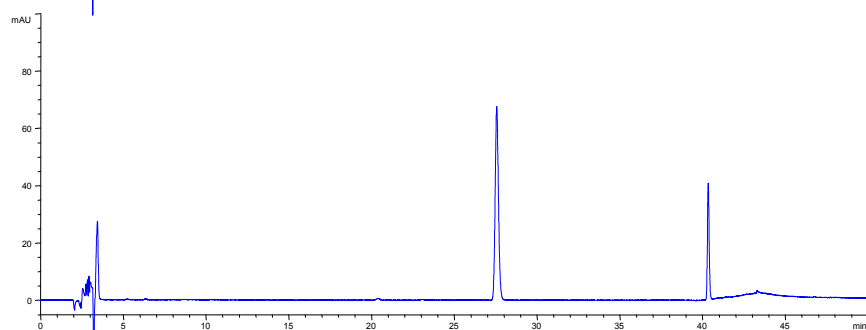

MtlIOMT7

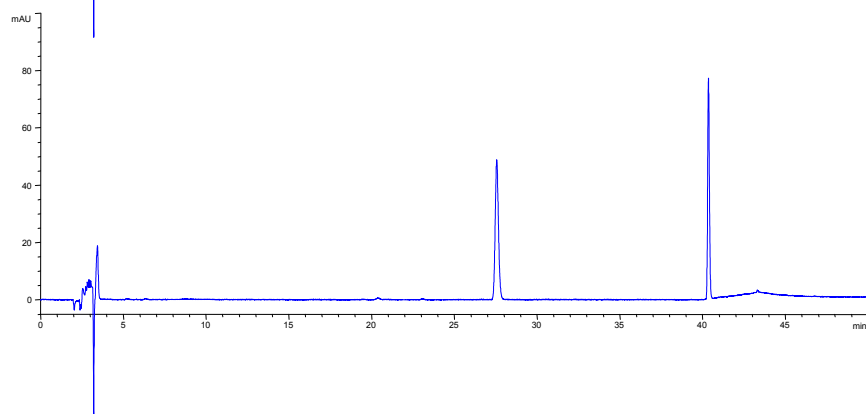

Figure S1(h), cont. HPLC traces of reaction products with vestitol

# dihydrodaidzein

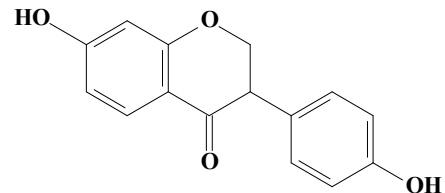

Control

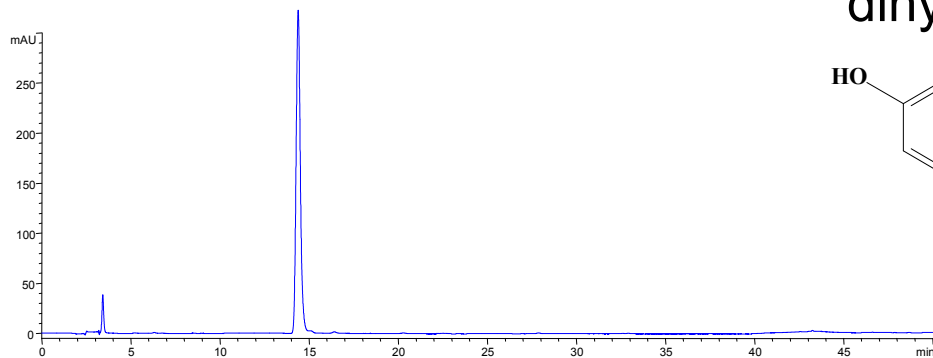

MtIOMT1

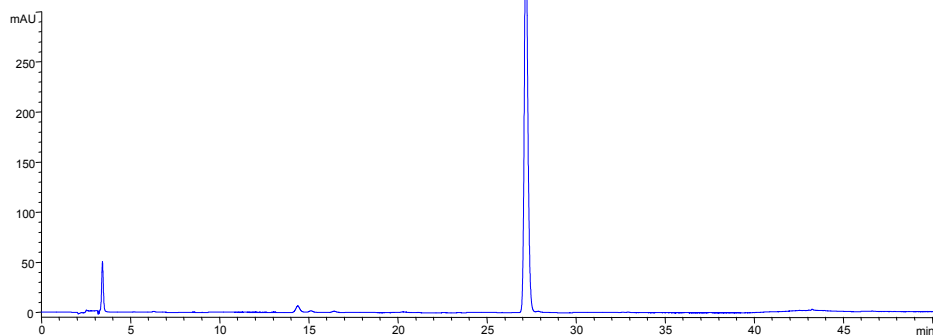

MtIOMT2

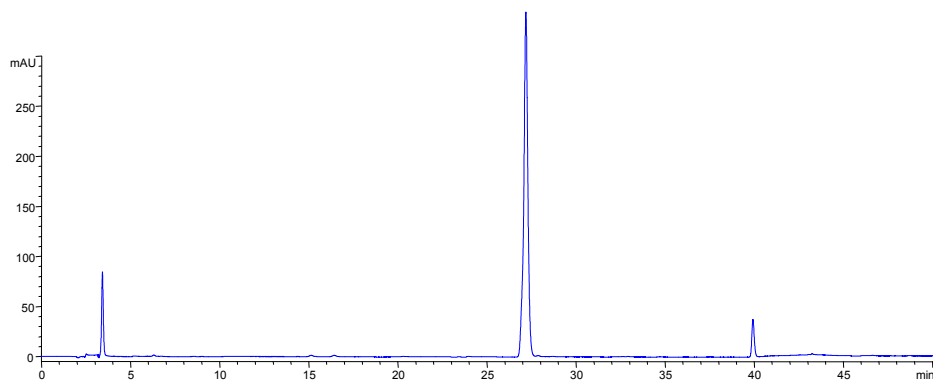

MtIOMT3

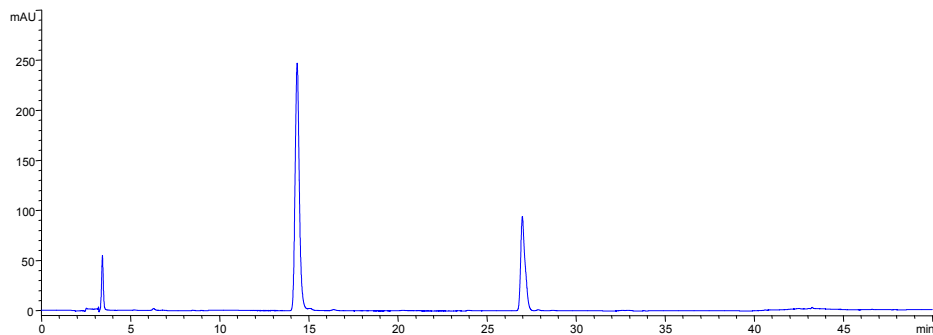

MtIOMT4

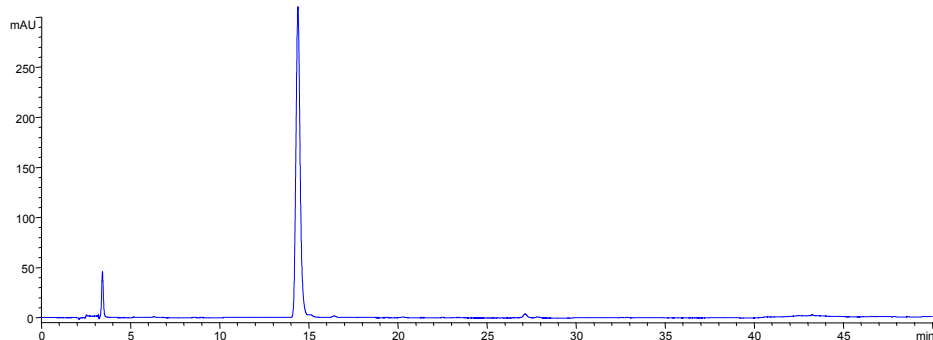

Figure S1(i). HPLC traces of reaction products with dihydrodaidzein

# dihydrodaidzein

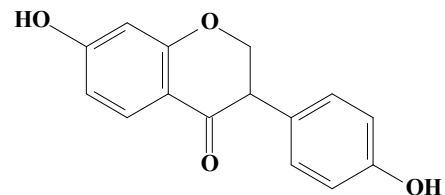

MtIOMT5

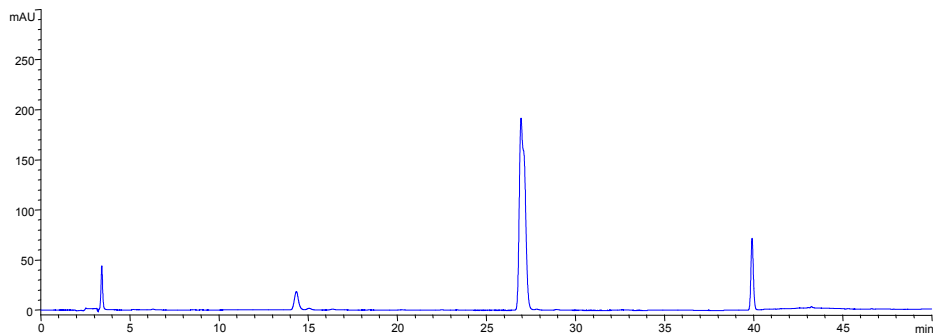

MtIOMT6

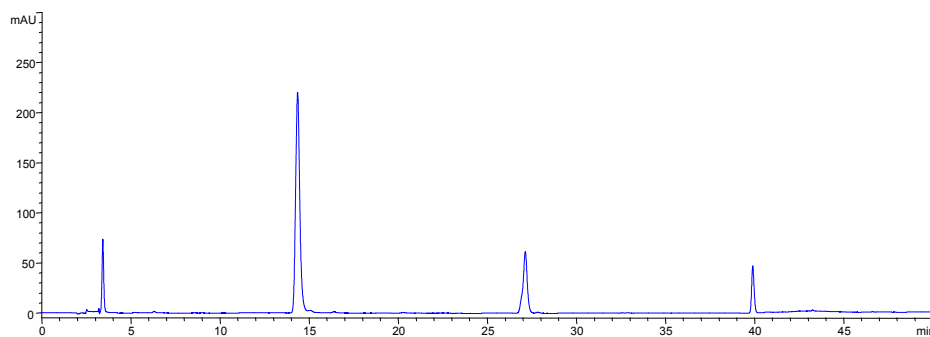

MtIOMT7

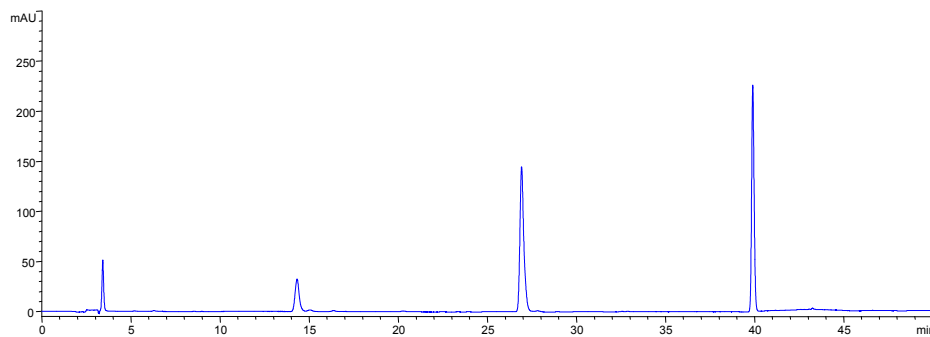

Figure S1(i), cont. HPLC traces of reaction products with dihydrodaidzein

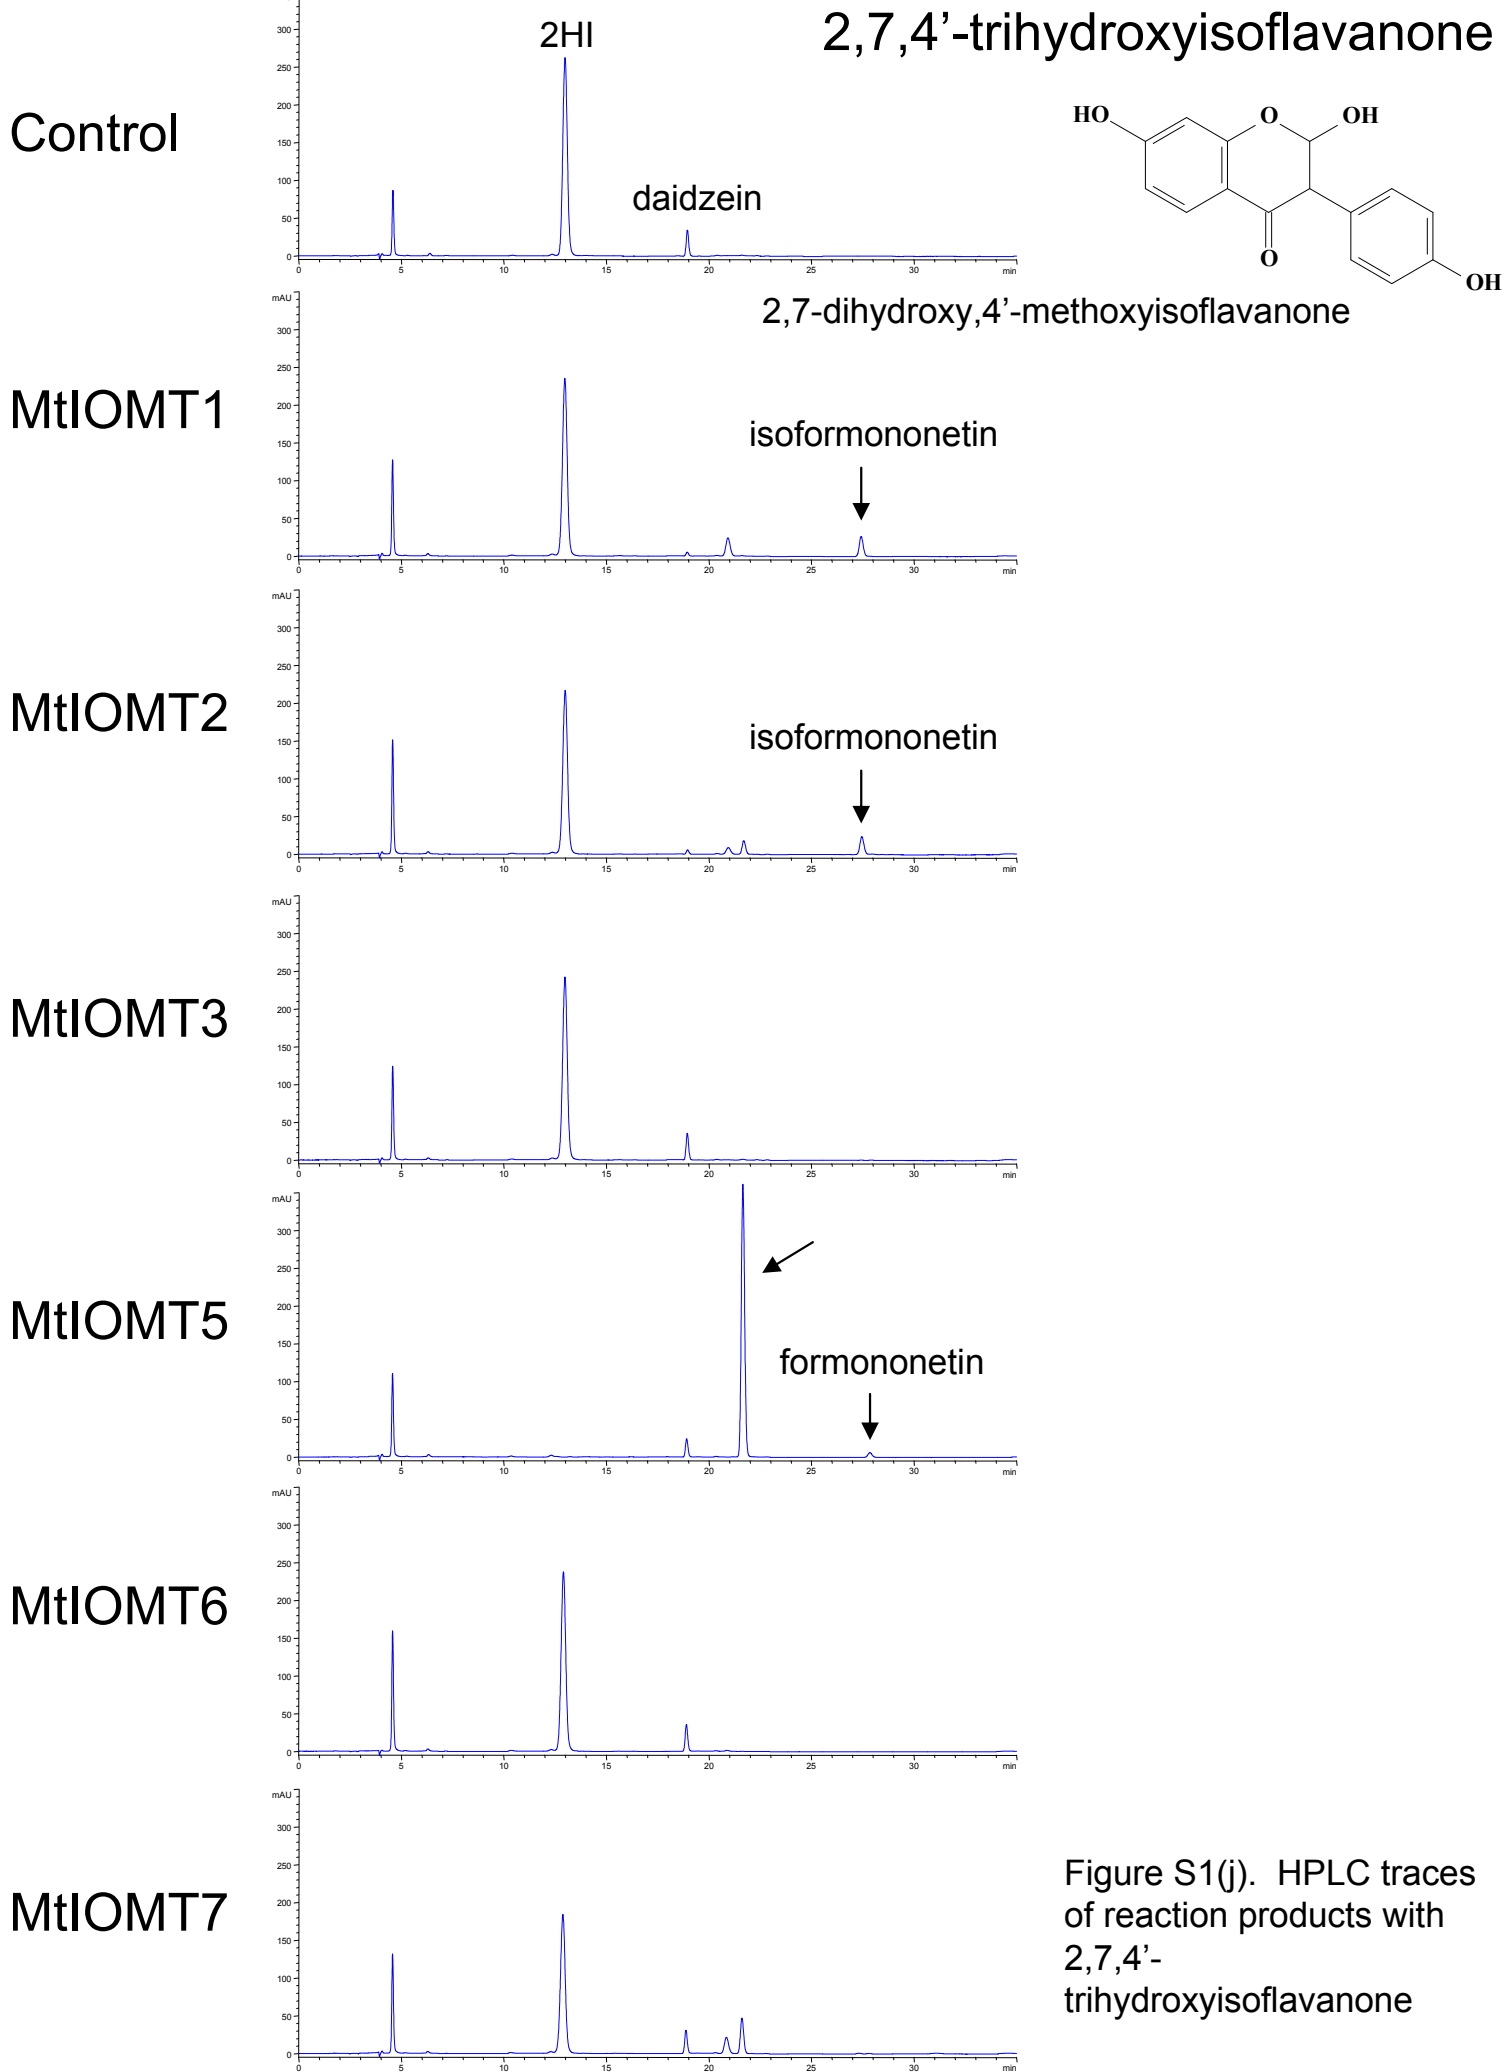

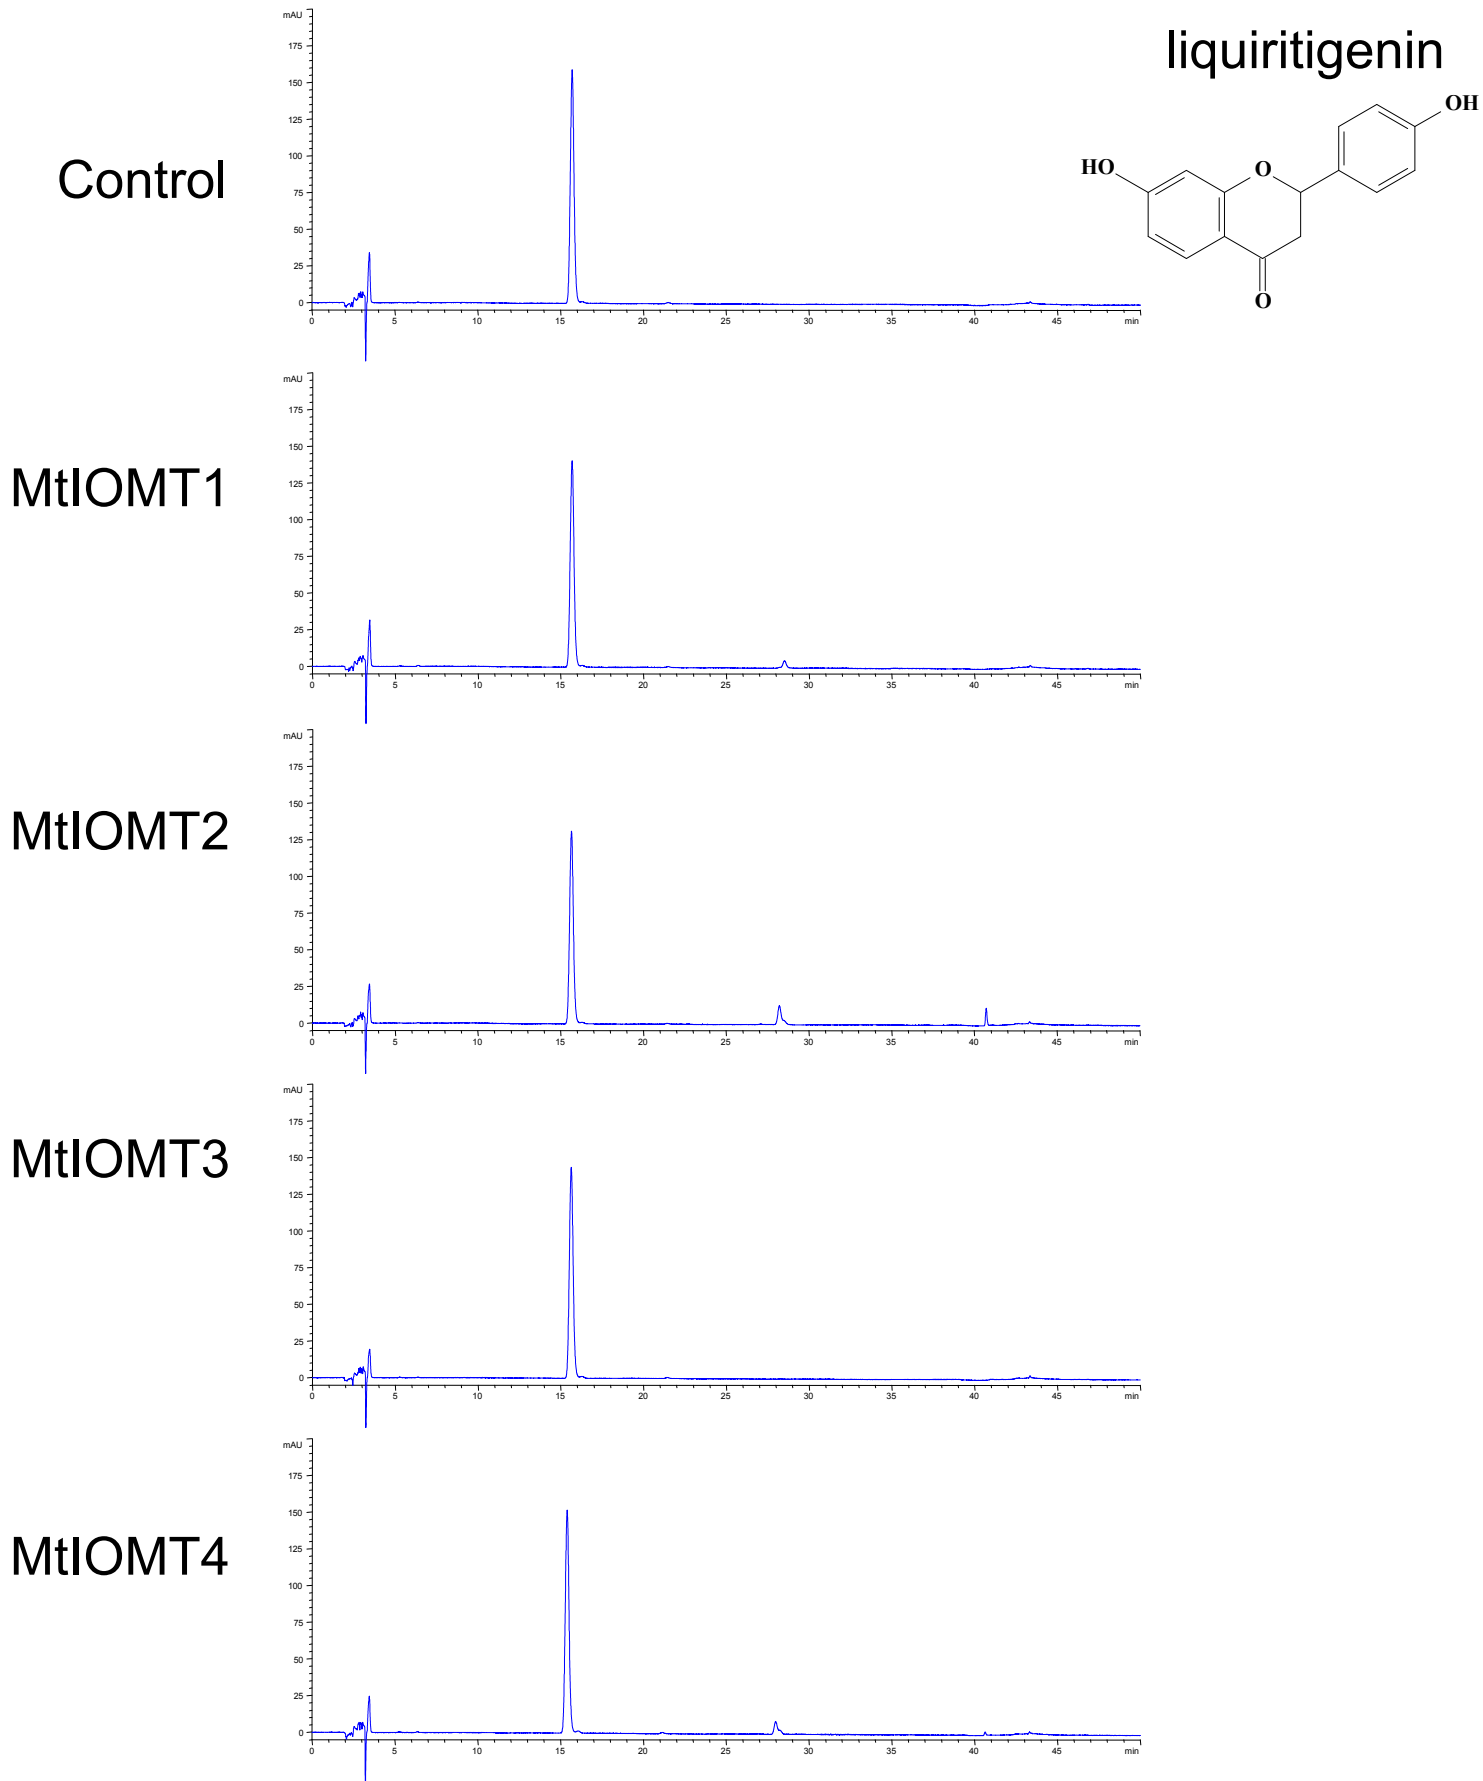

Figure S1(k). HPLC traces of reaction products with liquiritigenin

# liquiritigenin

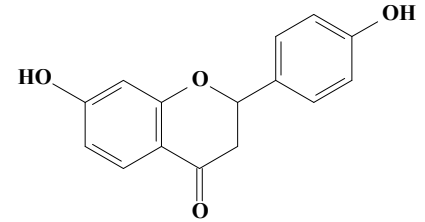

MtIOMT5

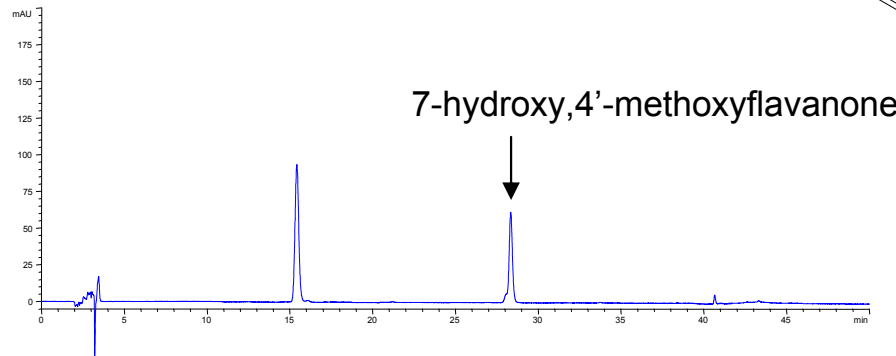

MtIOMT6

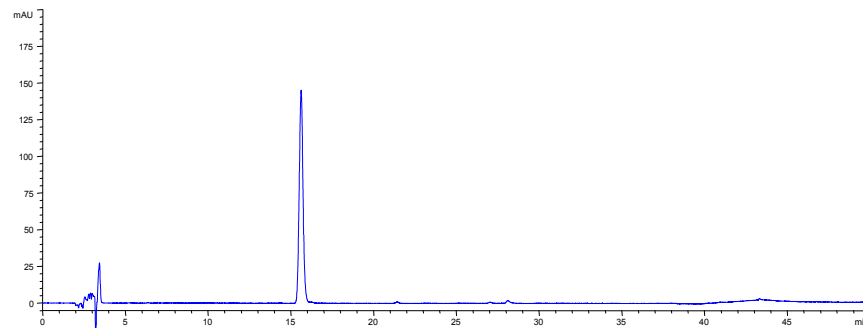

MtIOMT7

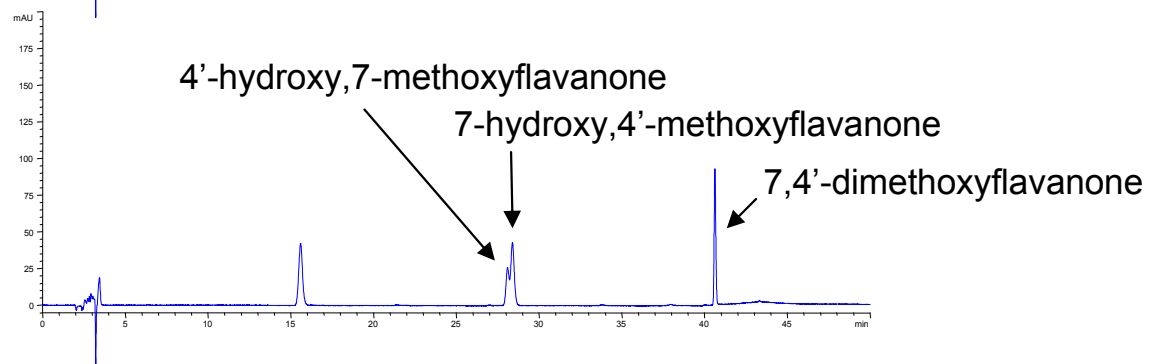

Figure S1(k), cont. HPLC traces of reaction products with liquiritigenin

# naringenin

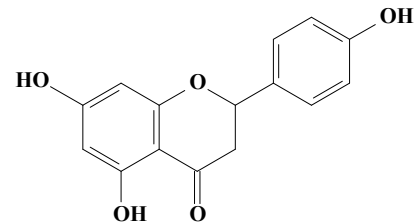

Control

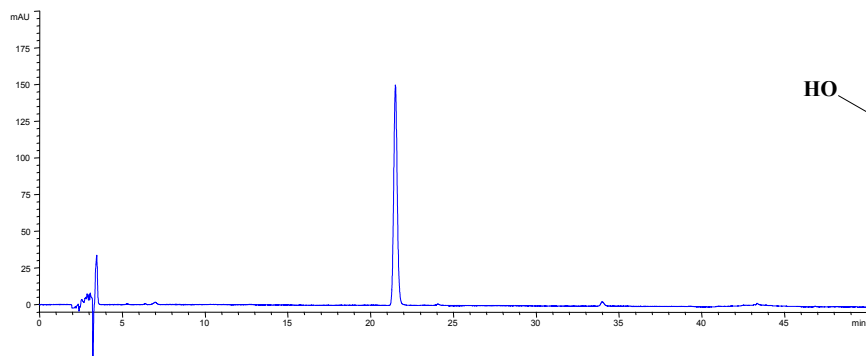

MtIOMT1

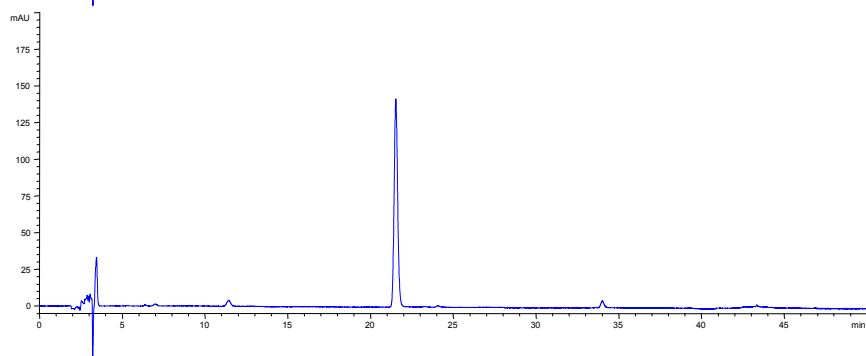

MtIOMT2

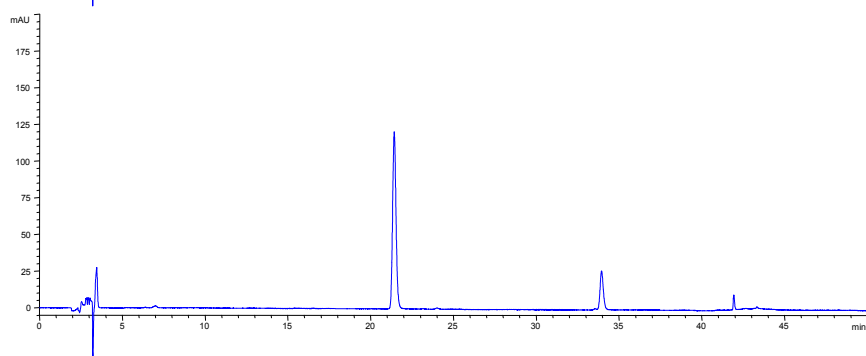

MtIOMT3

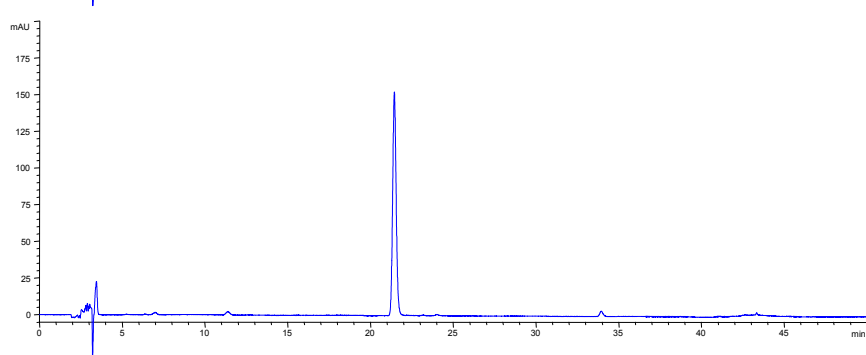

MtIOMT4

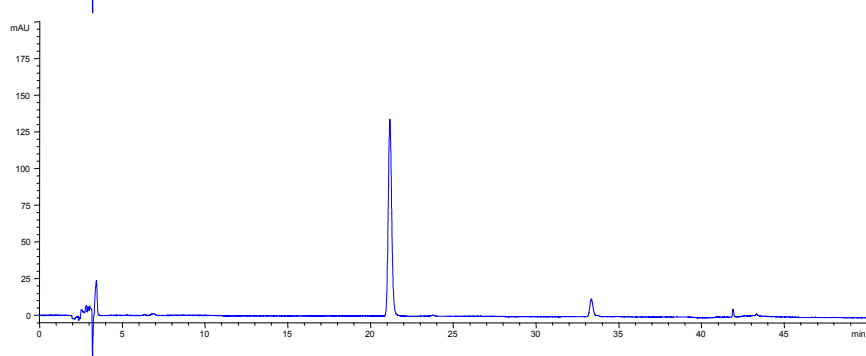

Figure S1(I). HPLC traces of reaction products with naringenin

# naringenin



MtIOMT5

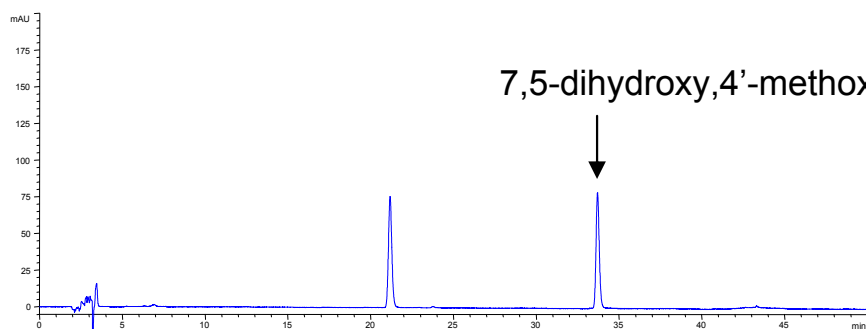

MtIOMT6

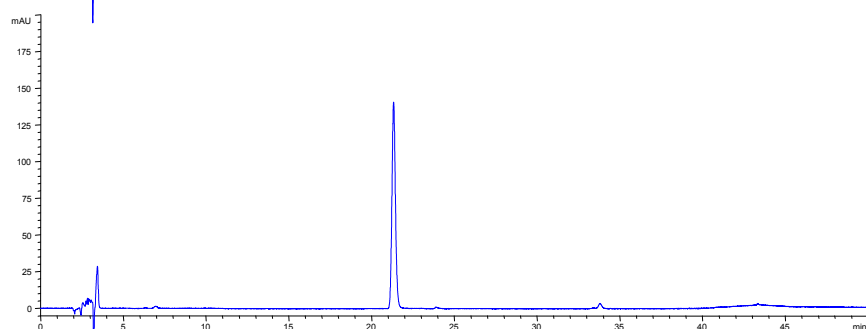

MtIOMT7

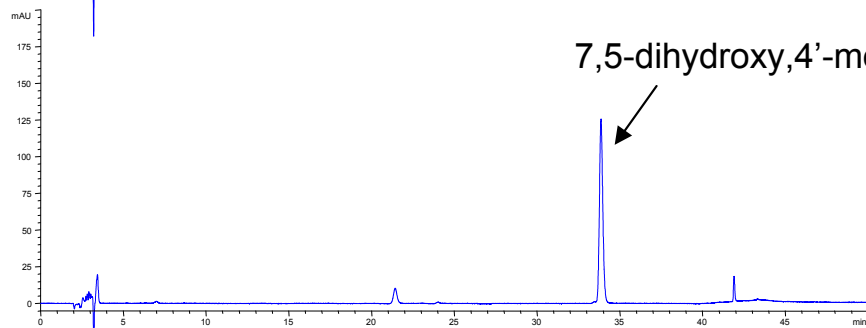

Standard

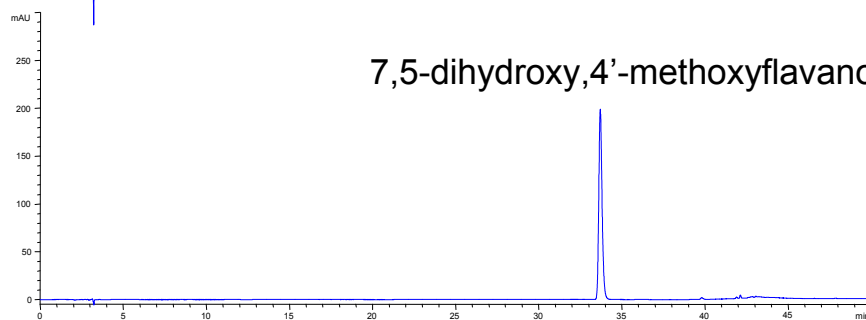

Figure S1(l), cont. HPLC traces of reaction products with naringenin



apigenin

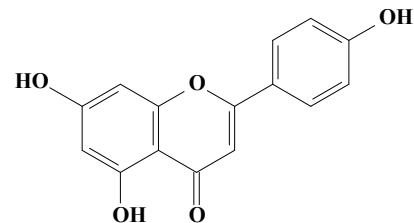

Control

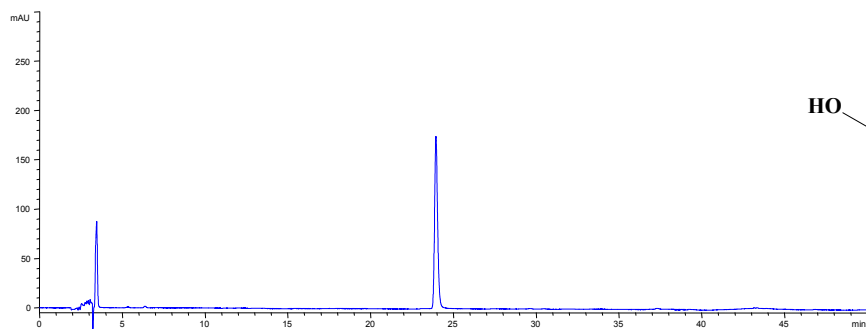

MtIOMT1

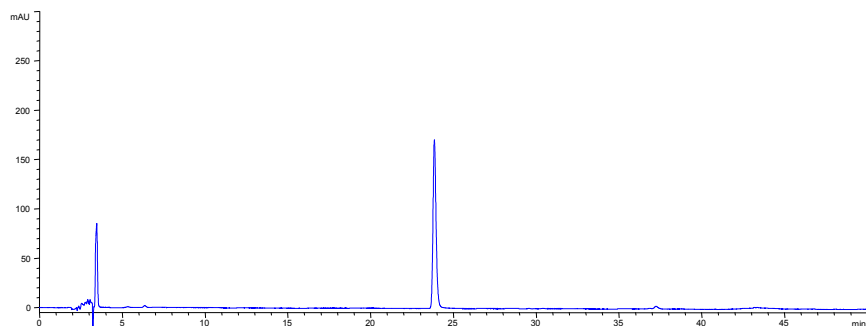

MtIOMT2

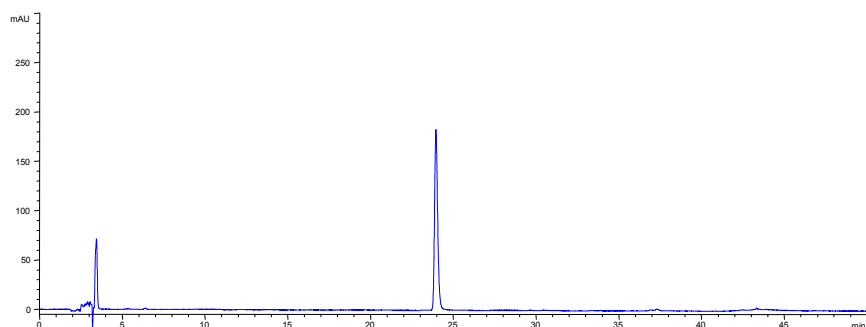

MtIOMT3

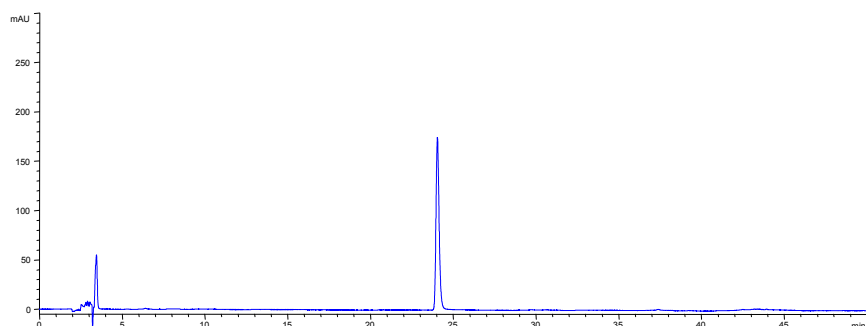

MtIOMT4

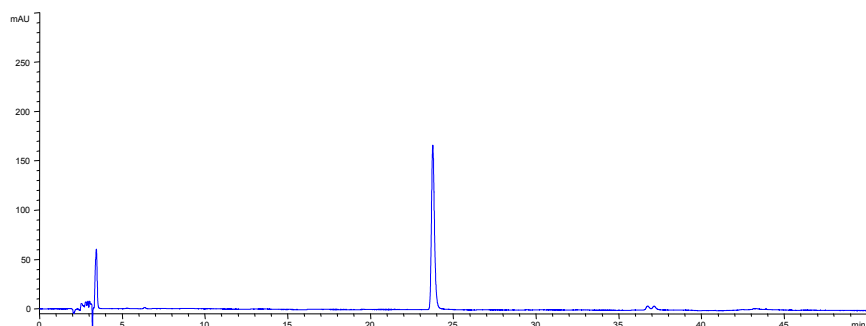

Figure S1(m). HPLC traces of reaction products with apigenin

apigenin

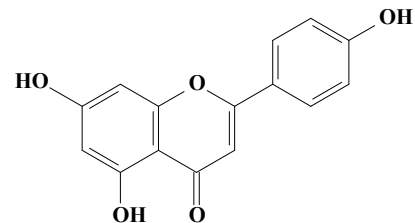

MtIOMT5

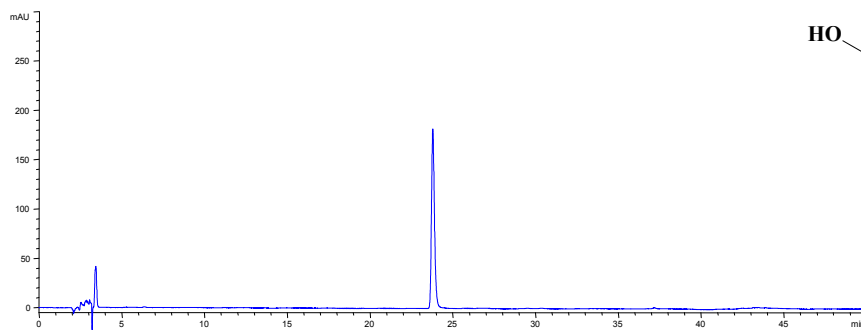

MtIOMT6

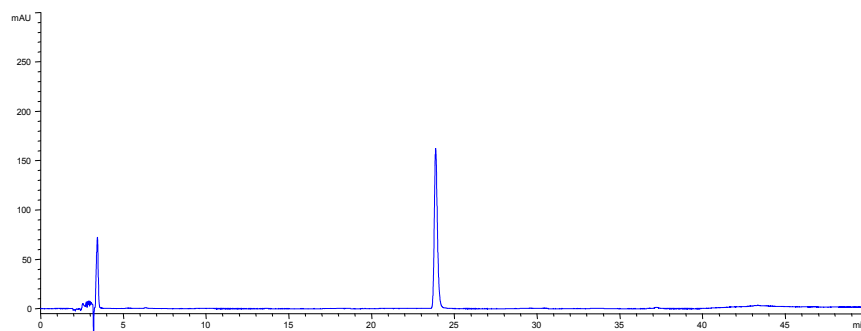

MtIOMT7

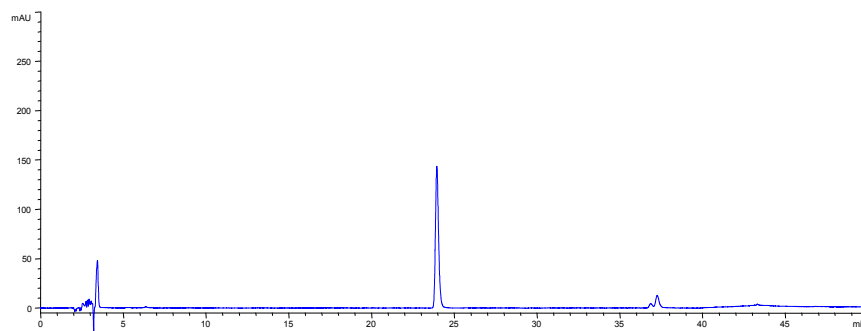

Figure S1(m), cont. HPLC traces of reaction products with apigenin

# 7,4'-dihydroxyflavone

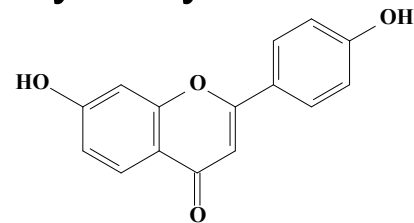

Control

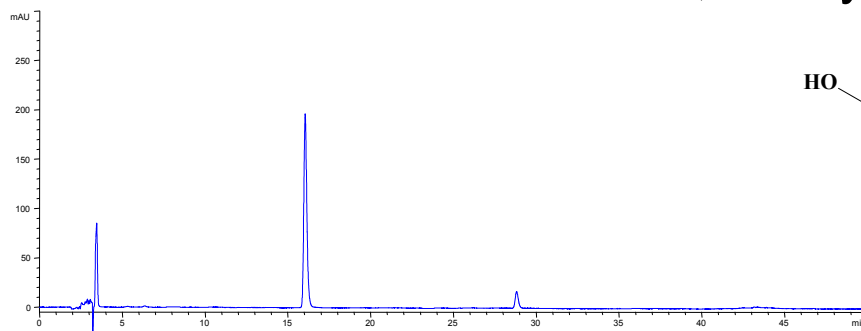

MtIOMT1

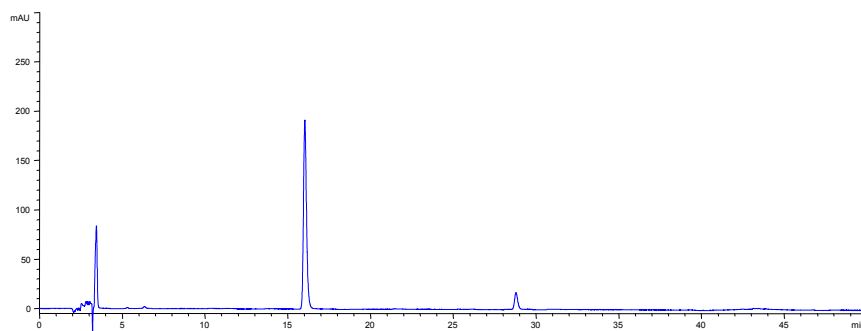

MtIOMT2

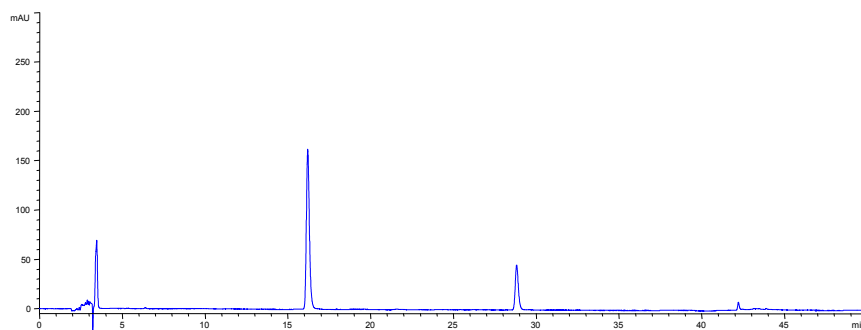

MtIOMT3

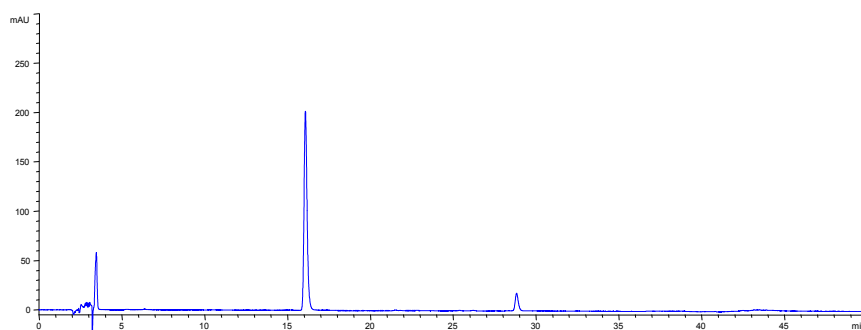

MtIOMT4

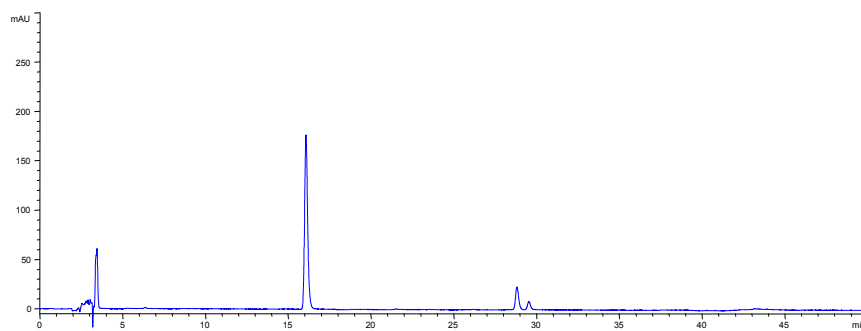

Figure S1(n). HPLC traces of reaction products with 7,4'-dihydroxyflavone

# 7,4'-dihydroxyflavone

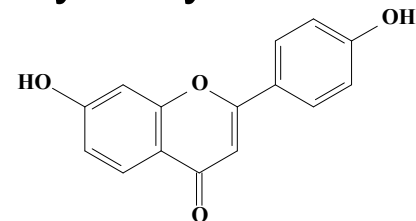

MtIOMT5

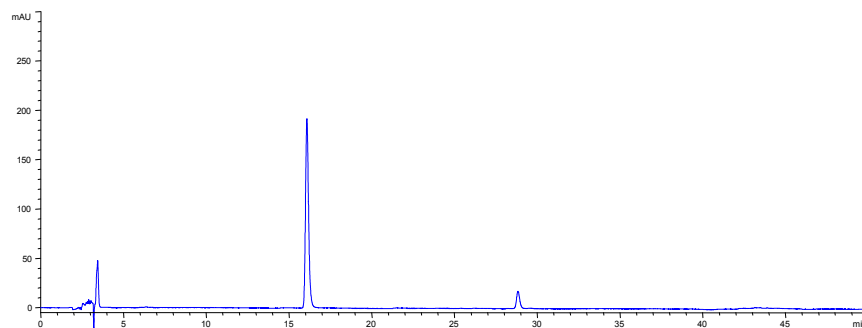

MtIOMT6

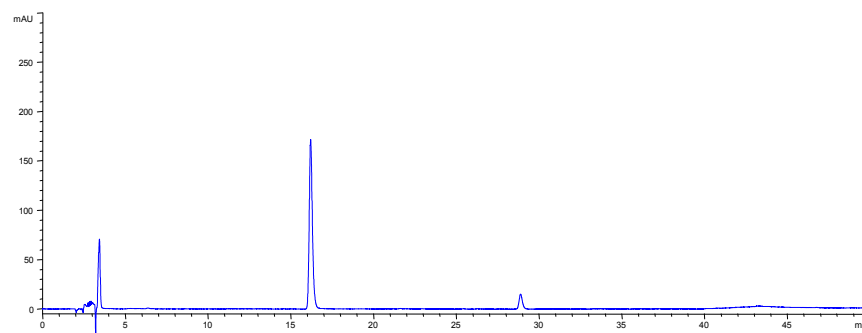

MtIOMT7

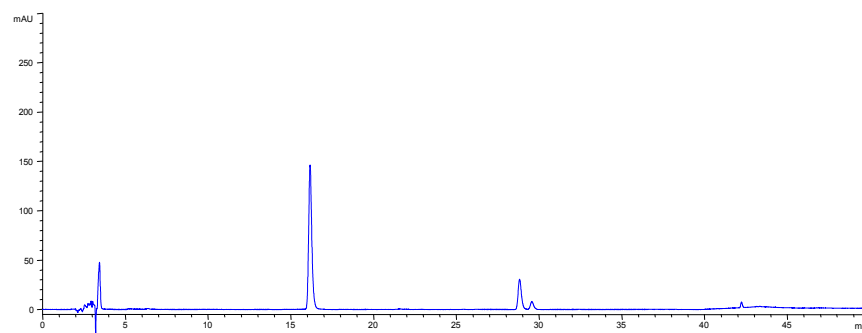

Figure S1(n), cont. HPLC traces of reaction products with 7,4'-dihydroxyflavone

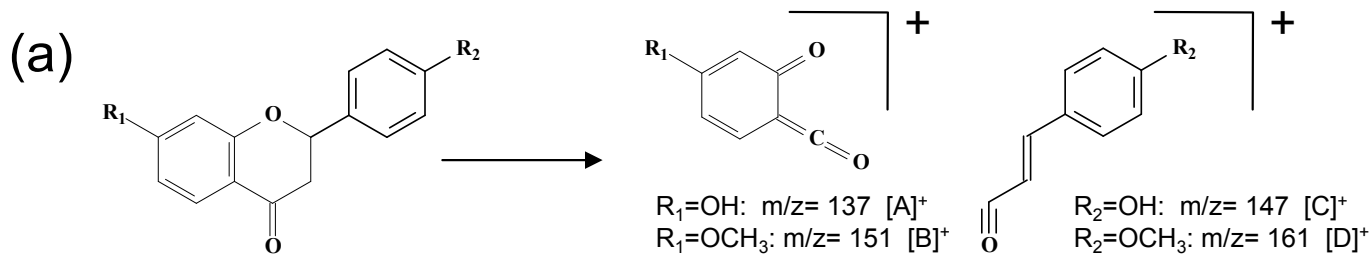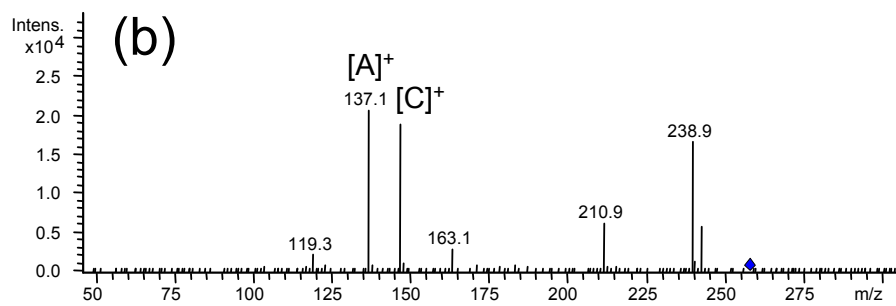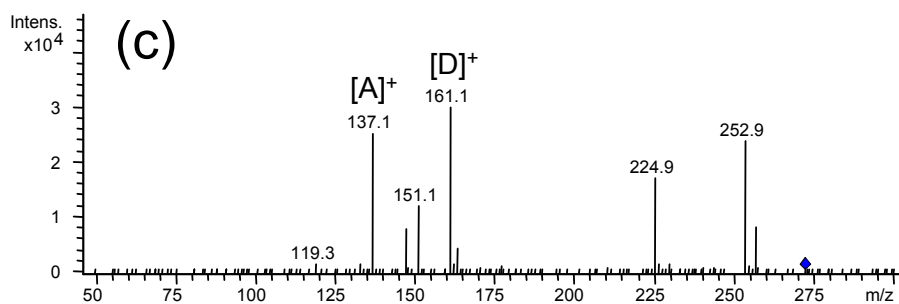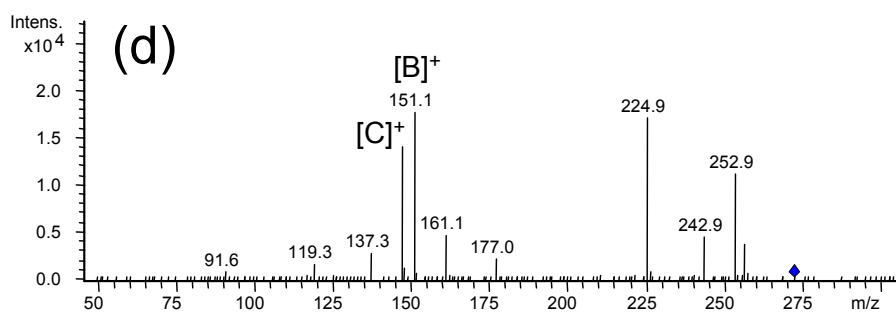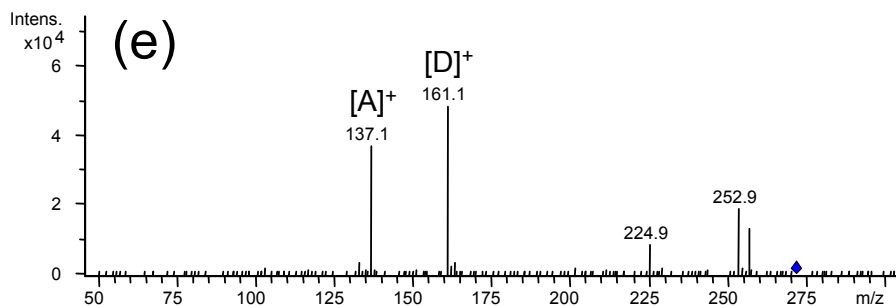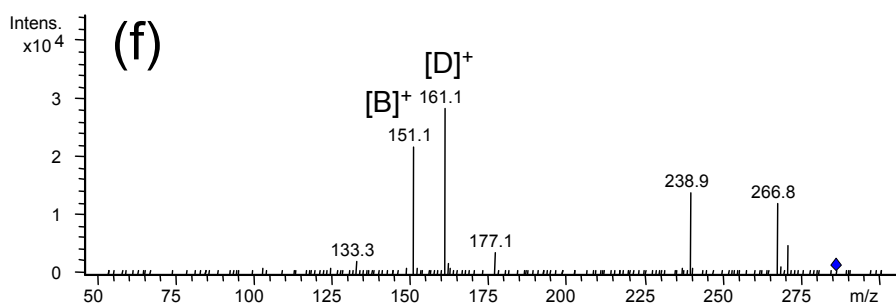

Figure S2. Positive ion LC/ESI/MSMS spectra of liquiritigenin reaction products. (a) Proposed fragmentation scheme. (b) Liquiritigenin, precursor ion is m/z 257. (c) MtlOMT5 methylated product, precursor ion is m/z 271. (d)-(f) MtlOMT7 methylated products, precursor ion is m/z 271 (d,e) or m/z 285 (f).

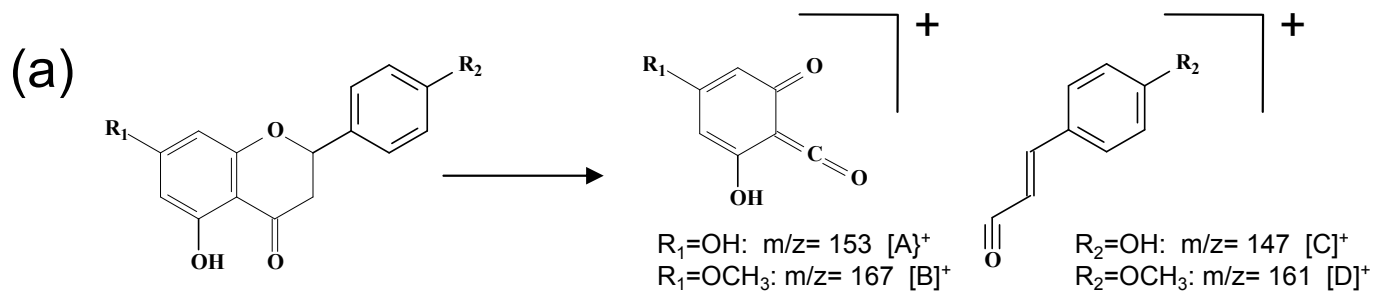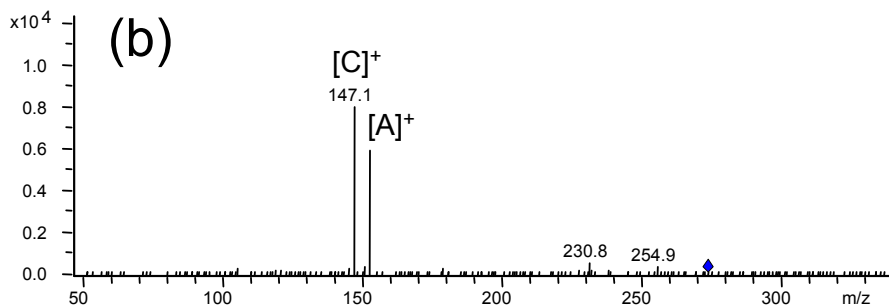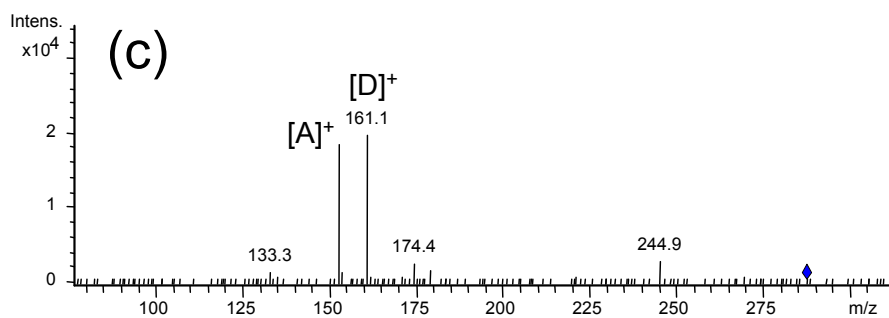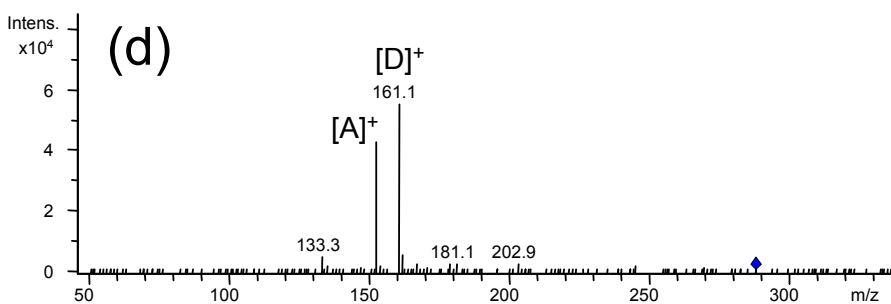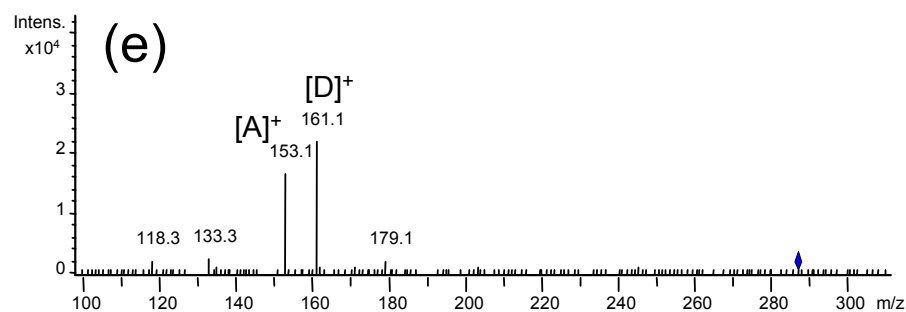

Figure S3. Positive ion LC/ESI/MSMS spectra of naringenin reaction products. (a) Proposed fragmentation scheme. (b) Naringenin, precursor ion is  $m/z$  273. (c) MtlOMT5 methylated product, precursor ion is 287. (d) MtlOMT7 methylated product, precursor ion is 287. (e) 5,7-Dihydroxy, 4'-methoxyflavanone standard, precursor ion is 287.

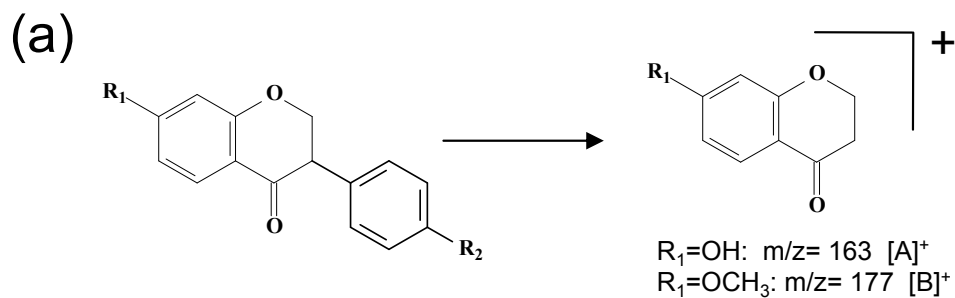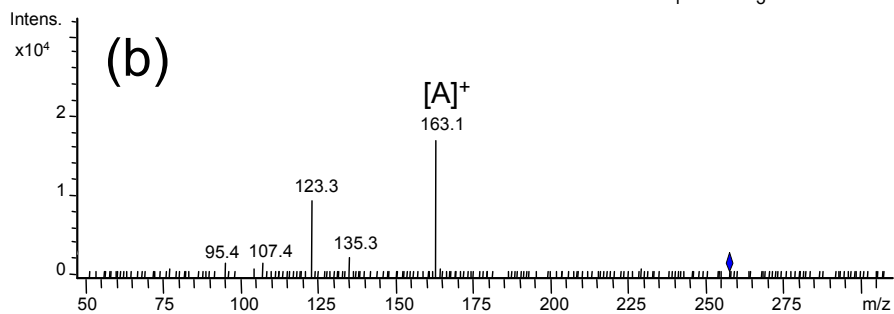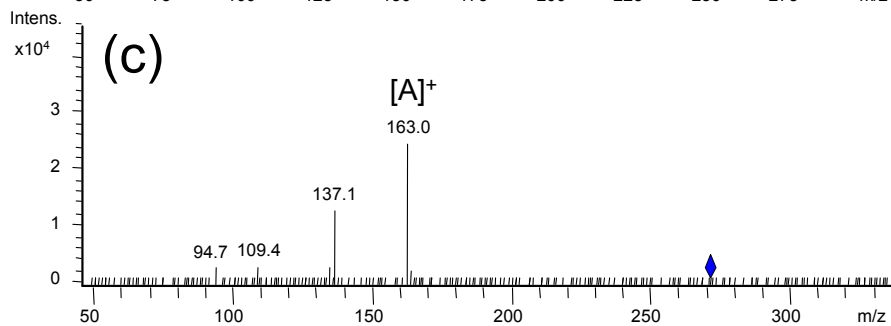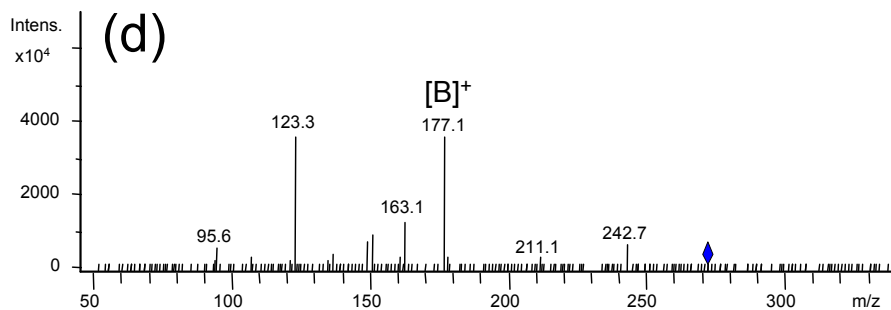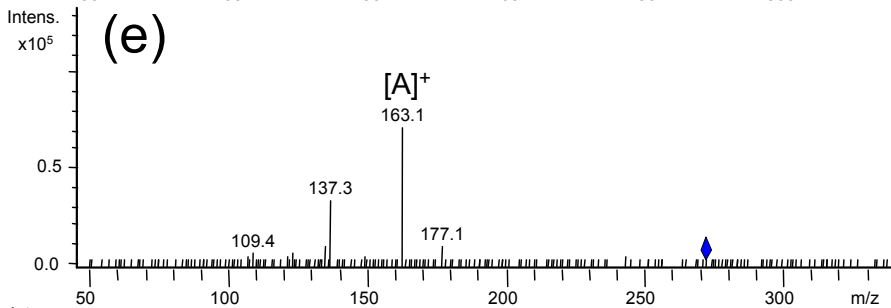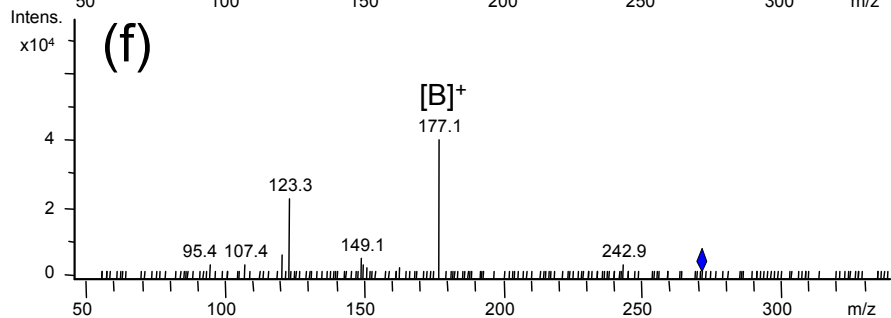

Figure S4. Positive ion LC/ESI/MSMS spectra of dihydrodaidzein reaction products. (a) Proposed fragmentation scheme. (b) Dihydrodaidzein, precursor ion is  $m/z$  257. (c)-(d) MtlOMT5 methylated products, precursor ion is  $m/z$  271. (e)-(f) MtlOMT7 methylated products precursor ion is  $m/z$  271.

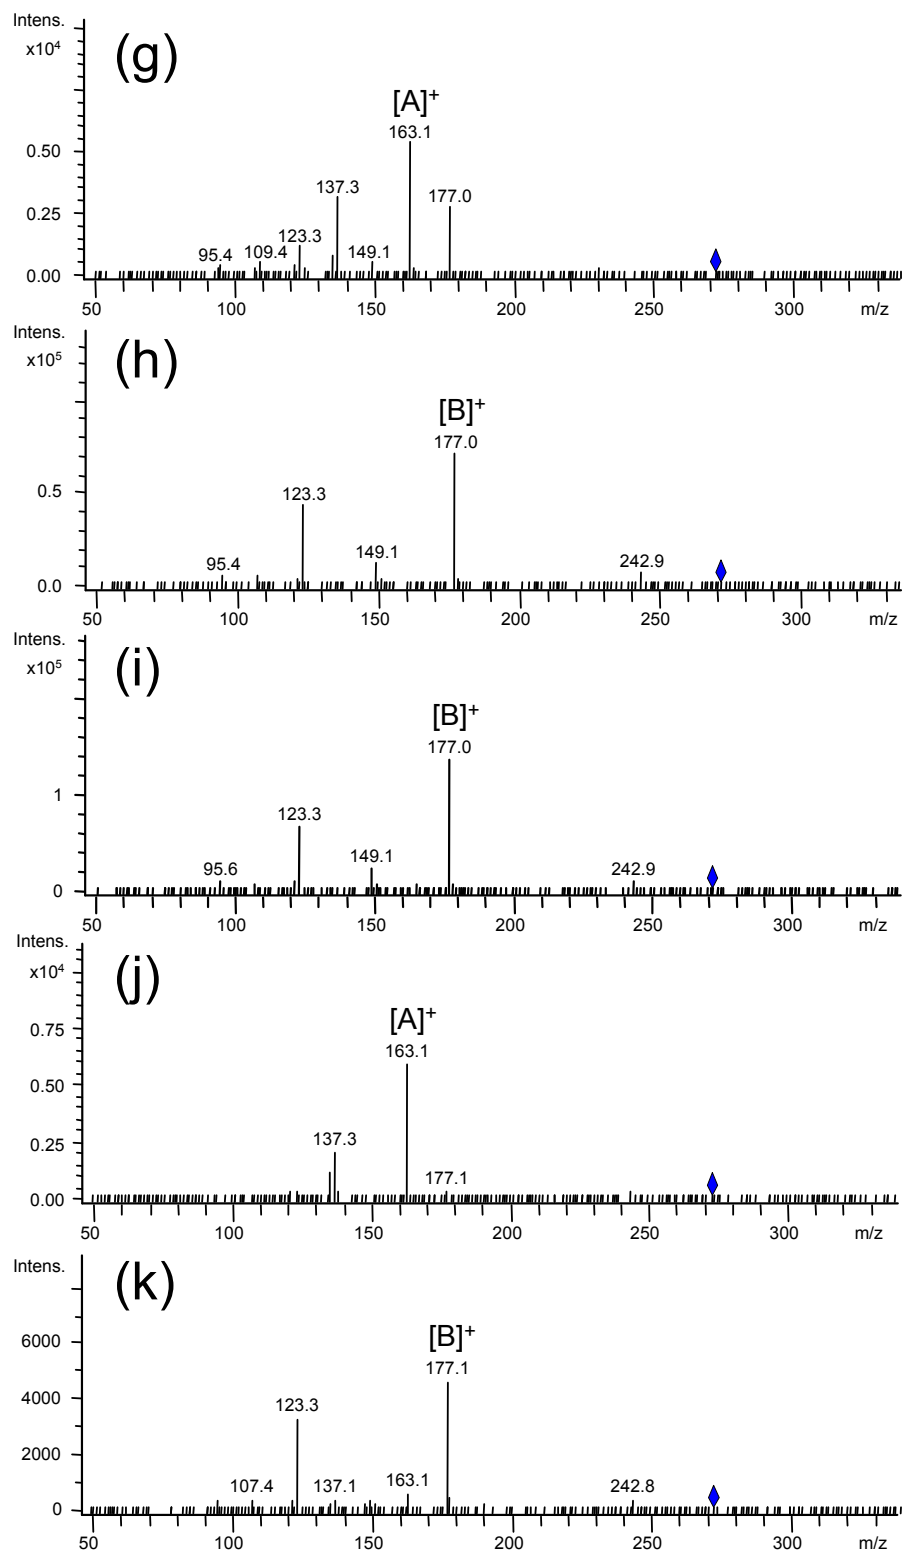

Figure S4, cont. (g)-(h) MtlOMT6 methylated products, precursor ion is m/z 271. (i) MtlOMT1 methylated product, precursor ion is m/z 271. (j)-(k) MtlOMT2 methylated products, precursor ion is m/z 271.



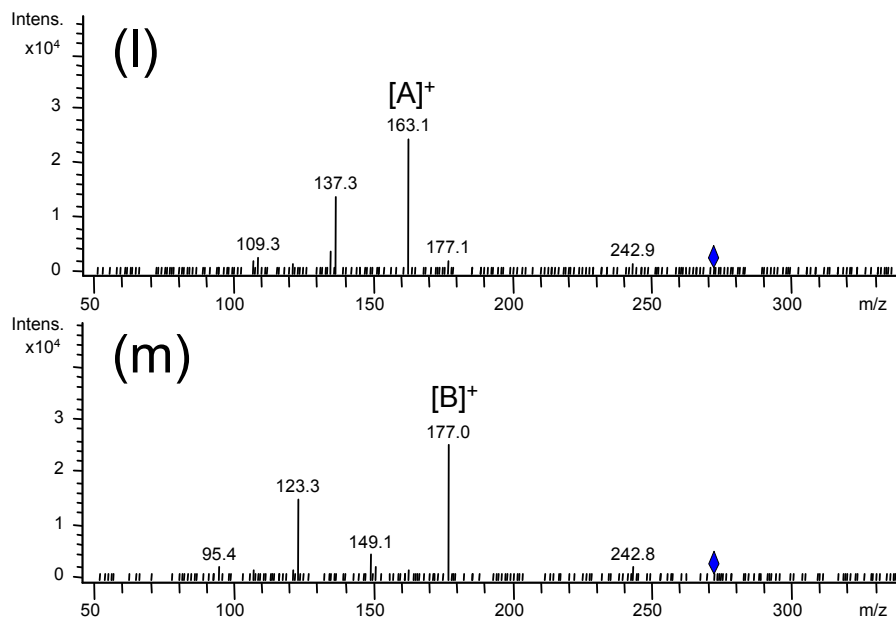

Figure S4, cont. (l)-(m). MtlOMT3 methylated products, precursor ion is m/z 271.

**Table S1** Primers used for RT-PCR (listed 5' to 3')

| MtIOMT  | Forward primer              | Reverse primer           |
|---------|-----------------------------|--------------------------|
| MtIOMT1 | cgggttcgtatcatgagctg        | gaatgcatgatggatcaatacaaa |
| MtIOMT2 | acaaaattttcatttgaggtgt      | ggatcaaacagaaccaaacattac |
| MtIOMT3 | gttcttgatccaacactttcaac     | tccaatcatgcaaaaaccgc     |
| MtIOMT4 | ttaacaccaatgggttcttatgtctac | atacgaccgtatcaatatgcct   |
| MtIOMT5 | acaatagtgaaaggcaaagaaggagat | aactttgcagcaacttcagg     |
| MtIOMT6 | acatggaaagcctatgactgttc     | acacaactccagtcccacctg    |
| MtIOMT7 | agaaacacaagacatcacccaag     | cttcttctccttctttgceat    |

**Table S2** Quantification of methylated products in reactions with dihydrodaidzein

|         | % 4'-<br>Methylated | % 7-<br>Methylated | %<br>Dimethylated | Ratio 4'/7-<br>methylated |
|---------|---------------------|--------------------|-------------------|---------------------------|
| MtIOMT1 | 0                   | >99                | <1                | 0                         |
| MtIOMT2 | 33                  | 66                 | <1                | 0.5                       |
| MtIOMT3 | 92                  | 8                  | 0                 | 11.4                      |
| MtIOMT4 | 0                   | 0                  | 0                 | 0                         |
| MtIOMT5 | 44                  | 25                 | 31                | 1.7                       |
| MtIOMT6 | 14                  | 38                 | 48                | 0.4                       |
| MtIOMT7 | 35                  | 3                  | 62                | 10.5                      |
